# Supplementary material for: Proteomic Exploration of Porcine Oocytes During Meiotic Maturation in vitro Using an Accurate TMT-Based Quantitative Approach
Source: Front Vet Sci. 2022 Feb 7;8:792869. doi: 10.3389/fvets.2021.792869 (PMC8859466; doi:10.3389/fvets.2021.792869)
Supplement: Supplementary Table S2 — Differentially expressed proteins. [file Table_2.xlsx]

## Sheet: MII vs GV
Protein accession	Protein description	MII/GV Ratio	Regulated Type	MII/GV P value	Gene name	MW [kDa]	Score	Coverage [%]	Peptides	PSMs	Unique peptides	MII_1	MII_2	MII_3	GV_1	GV_2	GV_3
A0A075B7I5	Uncharacterized protein OS=Sus scrofa OX=9823	0.655	Down	0.0129021	---	11.866	7.0402	17.7	2	4	2	0.698	0.825	0.76	1.178	1.151	1.156
A0A0M3KL56	"28S ribosomal protein S28, mitochondrial OS=Sus scrofa OX=9823 GN=MRPS28"	0.476	Down	4.07e-05	MRPS28	20.979	2.0115	4.3	1	1	1	0.678	0.744	0.739	1.572	1.448	1.519
A0A1P0REP6	Spastin OS=Sus scrofa OX=9823 GN=SPAST	1.664	Up	0.00026066	SPAST	67.599	50.298	19	10	13	10	1.141	1.238	1.139	0.717	0.662	0.735
A0A286ZI19	Amyloid beta precursor like protein 2 OS=Sus scrofa OX=9823 GN=APLP2	0.831	Down	0.043002	APLP2	84.573	5.178	4.3	3	3	3	0.998	0.888	1.102	1.224	1.16	1.212
A0A286ZID6	DAZ-associated protein 1 OS=Sus scrofa OX=9823 GN=DAZAP1	0.742	Down	0.0073956	DAZAP1	40.691	42.797	11.9	3	4	3	0.863	0.906	0.885	1.129	1.116	1.332
A0A286ZIN0	Heterogeneous nuclear ribonucleoprotein D OS=Sus scrofa OX=9823 GN=HNRNPD	0.822	Down	0.0164363	HNRNPD	32.785	25.809	15.7	5	10	5	0.853	0.932	1.009	1.127	1.114	1.16
A0A286ZJ52	Mitotic arrest deficient 2 like 1 OS=Sus scrofa OX=9823 GN=MAD2L1	2.545	Up	0.00018444	MAD2L1	23.508	36.783	24.9	5	8	5	1.467	1.171	1.243	0.513	0.523	0.489
A0A286ZJG2	Ubiquitin like with PHD and ring finger domains 2 OS=Sus scrofa OX=9823 GN=UHRF2	1.426	Up	1.37e-06	UHRF2	89.827	323.31	54.4	44	113	44	1.073	1.065	1.071	0.756	0.737	0.758
A0A286ZJI1	Diphosphoinositol pentakisphosphate kinase 2 OS=Sus scrofa OX=9823 GN=PPIP5K2	1.325	Up	5.74e-05	PPIP5K2	128.49	25.017	12.8	13	14	13	1.072	1.044	1.073	0.815	0.782	0.809
A0A286ZJK2	Heterogeneous nuclear ribonucleoprotein M OS=Sus scrofa OX=9823 GN=HNRNPM	0.683	Down	0.0034986	HNRNPM	73.588	13.221	9.8	7	9	7	0.803	0.865	0.971	1.216	1.328	1.319
A0A286ZJR2	"Peptidyl-tRNA hydrolase ICT1, mitochondrial OS=Sus scrofa OX=9823 GN=MRPL58"	0.676	Down	0.0043396	MRPL58	23.502	1.7023	3.9	1	1	1	0.8	0.926	0.992	1.4	1.331	1.289
A0A286ZJR3	Heterogeneous nuclear ribonucleoprotein U OS=Sus scrofa OX=9823 GN=HNRNPU	1.408	Up	0.0101171	HNRNPU	77.186	20.258	13.6	10	12	1	0.979	1.175	1.083	0.801	0.81	0.688
A0A286ZK95	Transcription and mRNA export factor ENY2 OS=Sus scrofa OX=9823 GN=ENY2	1.237	Up	0.0134023	ENY2	11.528	2.3366	14.9	2	2	2	0.903	1.025	1.017	0.807	0.749	0.824
A0A286ZKW2	Paraspeckle component 1 OS=Sus scrofa OX=9823 GN=PSPC1	0.807	Down	0.0062212	PSPC1	58.389	64.054	21.1	11	14	9	1.023	0.893	0.928	1.159	1.184	1.181
A0A286ZL07	"BUB3, mitotic checkpoint protein OS=Sus scrofa OX=9823 GN=BUB3"	1.209	Up	0.0190596	BUB3	36.766	52.838	25.3	7	9	7	0.931	1.067	1.05	0.854	0.867	0.8
A0A286ZL47	Cell adhesion molecule L1 like OS=Sus scrofa OX=9823 GN=CHL1	0.833	Down	0.034256	CHL1	129.24	2.1319	0.8	1	1	1	0.8	0.949	0.865	0.985	1.095	1.059
A0A286ZL62	Ceramide synthase 4 OS=Sus scrofa OX=9823 GN=CERS4	0.712	Down	0.0047173	CERS4	42.041	7.1823	7.5	2	5	2	0.791	0.792	0.911	1.104	1.252	1.147
A0A286ZLA5	Nuclear receptor coactivator 2 OS=Sus scrofa OX=9823 GN=NCOA2	4.151	Up	3.9e-06	NCOA2	148.65	1.8603	0.6	1	1	1	1.258	1.371	1.252	0.295	0.305	0.335
A0A286ZLB4	Bromodomain adjacent to zinc finger domain protein 1A OS=Sus scrofa OX=9823 GN=BAZ1A	1.369	Up	0.0005447	BAZ1A	171.22	2.4033	1.2	2	2	2	1.061	1.042	1.13	0.79	0.812	0.76
A0A286ZLG1	Tescalcin OS=Sus scrofa OX=9823 GN=TESC	1.355	Up	0.00068018	TESC	22.807	42.288	19.7	4	5	4	1.239	1.159	1.175	0.903	0.897	0.836
A0A286ZLP7	Uncharacterized protein OS=Sus scrofa OX=9823 GN=PSMD9	1.326	Up	0.00171977	PSMD9	24.416	103.51	35	9	16	9	1.172	1.094	1.048	0.863	0.828	0.809
A0A286ZLQ5	Uncharacterized protein OS=Sus scrofa OX=9823 GN=CXHXorf67	1.377	Up	0.00140323	CXHXorf67	52.179	66.822	33.2	15	21	15	1.181	1.038	1.063	0.806	0.784	0.793
A0A286ZM51	Crystallin gamma B OS=Sus scrofa OX=9823 GN=CRYGB	1.231	Up	0.037464	CRYGB	21.162	11.469	17.7	3	4	3	1.204	1.069	0.985	0.902	0.919	0.825
A0A286ZMD7	Gem nuclear organelle associated protein 6 OS=Sus scrofa OX=9823 GN=GEMIN6	0.728	Down	0.043857	GEMIN6	18.732	7.2239	14.5	3	3	3	0.985	0.848	0.728	1.246	1.254	1.02
A0A286ZMJ8	Uncharacterized protein OS=Sus scrofa OX=9823 GN=PRC1	1.902	Up	0.00156332	PRC1	66.23	38.075	19.4	12	15	12	1.28	1.285	1.147	0.564	0.655	0.733
A0A286ZML8	Nuclear receptor coactivator 3 OS=Sus scrofa OX=9823 GN=NCOA3	2.082	Up	0.0009044	NCOA3	143.83	8.9794	17.1	19	27	2	1.079	1.362	1.23	0.608	0.533	0.622
A0A286ZMV5	Oocyte secreted protein 2 OS=Sus scrofa OX=9823 GN=OOSP2	2.377	Up	0.0101639	OOSP2	17.184	39.178	32.5	4	16	4	0.752	1.32	1.253	0.486	0.477	0.436
A0A286ZMX2	Ubiquitin conjugating enzyme E2 S OS=Sus scrofa OX=9823 GN=UBE2S	1.433	Up	0.033758	UBE2S	23.958	21.293	9.4	2	3	2	1.408	1.14	1.035	0.733	0.853	0.915
A0A286ZMY1	Microtubule associated scaffold protein 1 OS=Sus scrofa OX=9823 GN=MTUS1	0.733	Down	0.00083595	MTUS1	136.66	64.242	17.7	22	33	22	0.926	0.857	0.862	1.221	1.147	1.239
A0A286ZNH3	Reactive intermediate imine deaminase A homolog OS=Sus scrofa OX=9823 GN=RIDA	1.831	Up	0.000101794	RIDA	14.369	68.192	42.3	5	11	5	1.288	1.146	1.148	0.654	0.658	0.644
A0A286ZNR7	Transmembrane protein 128 OS=Sus scrofa OX=9823 GN=TMEM128	5.492	Up	0.000199464	TMEM128	19.223	15.083	21.2	3	7	3	1.702	1.496	1.124	0.275	0.241	0.271
A0A286ZPG8	Nuclear distribution protein nudE-like 1 OS=Sus scrofa OX=9823 GN=NDEL1	1.415	Up	0.000144274	NDEL1	35.553	66.683	17.5	6	10	5	1.219	1.156	1.148	0.814	0.819	0.856
A0A286ZPN8	Far upstream element binding protein 1 OS=Sus scrofa OX=9823 GN=FUBP1	1.254	Up	0.0135172	FUBP1	69.85	86.034	22.2	13	13	11	1.231	1.096	1.032	0.913	0.888	0.878
A0A286ZQP0	von Willebrand factor A domain-containing protein 7 precursor OS=Sus scrofa OX=9823 GN=VWA7	1.544	Up	0.00029771	VWA7	93.273	40.184	7.2	5	5	4	1.158	1.09	1.174	0.737	0.703	0.777
A0A286ZRE1	Tropomyosin alpha-1 chain OS=Sus scrofa OX=9823 GN=TPM1	0.489	Down	0.00022496	TPM1	40.177	5.688	21.7	8	8	2	0.725	0.677	0.811	1.575	1.481	1.469
A0A286ZRS3	Lipase maturation factor OS=Sus scrofa OX=9823 GN=LMF1	0.601	Down	0.042576	LMF1	63.471	6.7966	6.6	3	3	3	1.06	0.761	0.758	1.437	1.415	1.439
A0A286ZS56	Cortactin OS=Sus scrofa OX=9823 GN=CTTN	1.703	Up	0.00104395	CTTN	60.883	100.7	29.8	17	23	17	1.305	1.114	1.071	0.68	0.667	0.702
A0A286ZS65	Cytoplasmic polyadenylation element binding protein 3 OS=Sus scrofa OX=9823 GN=CPEB3	0.657	Down	0.0059155	CPEB3	75.307	3.0671	1.3	1	1	1	0.709	0.913	0.833	1.245	1.309	1.183
A0A286ZS83	Heterogeneous nuclear ribonucleoproteins C1/C2 isoform 2 OS=Sus scrofa OX=9823 GN=HNRNPC	1.597	Up	0.00050428	HNRNPC	32.09	72.963	21.1	7	9	7	1.107	1.15	1.112	0.646	0.713	0.751
A0A286ZSG6	Epithelial stromal interaction 1 OS=Sus scrofa OX=9823 GN=EPSTI1	2.105	Up	2.13e-05	EPSTI1	35.917	22.962	21.7	6	7	6	1.208	1.183	1.151	0.551	0.594	0.538
A0A286ZSM4	Myotubularin related protein 2 OS=Sus scrofa OX=9823 GN=MTMR2	0.678	Down	0.0023008	MTMR2	66.05	32.061	20.3	12	13	12	0.956	0.862	0.794	1.292	1.318	1.241
A0A286ZSN4	Family with sequence similarity 241 member B OS=Sus scrofa OX=9823 GN=FAM241B	2.433	Up	0.000158557	FAM241B	13.154	43.573	22.5	2	5	2	1.256	1.148	1.291	0.487	0.471	0.561
A0A286ZSZ5	Oxysterol-binding protein OS=Sus scrofa OX=9823 GN=OSBPL9	1.237	Up	0.0040404	OSBPL9	81.694	19.68	9.5	7	12	6	1.133	1.104	1.023	0.862	0.862	0.911
A0A286ZTN0	Nuclear receptor-binding protein OS=Sus scrofa OX=9823 GN=NRBP1	0.768	Down	0.034795	NRBP1	59.83	32.829	12.9	5	5	5	0.764	0.873	0.982	1.183	1.038	1.189
A0A286ZU83	Versican core protein precursor OS=Sus scrofa OX=9823 GN=VCAN	1.358	Up	0.00061838	VCAN	38.274	41.09	27.3	9	16	9	1.11	1.134	1.116	0.786	0.815	0.873
A0A286ZUC0	Non-specific serine/threonine protein kinase OS=Sus scrofa OX=9823 GN=MARK2	0.782	Down	0.0181979	MARK2	79.356	16.084	11.4	6	6	6	0.804	0.891	0.925	1.225	1.047	1.08
A0A286ZUH0	Caldesmon 1 OS=Sus scrofa OX=9823 GN=CALD1	0.753	Down	0.034345	CALD1	60.341	3.3212	3.7	2	2	2	1.01	0.857	0.86	1.217	1.211	1.193
A0A286ZV86	Uncharacterized protein OS=Sus scrofa OX=9823	0.812	Down	0.021645	---	12.374	46.471	41.3	3	5	2	0.821	0.961	0.806	1.032	1.086	1.07
A0A286ZVE6	LIM domain 7 OS=Sus scrofa OX=9823 GN=LMO7	0.649	Down	0.00088273	LMO7	182.22	174.85	18.9	27	31	27	0.92	0.843	0.779	1.297	1.33	1.291
A0A286ZW04	Core-binding factor beta subunit OS=Sus scrofa OX=9823 GN=CBFB	2.634	Up	0.00020459	CBFB	17.96	1.7819	5.2	1	1	1	1.262	1.192	1.273	0.51	0.406	0.499
A0A286ZWJ2	Eukaryotic translation elongation factor 1 epsilon-1 OS=Sus scrofa OX=9823 GN=EEF1E1	1.433	Up	0.021185	EEF1E1	19.725	2.8986	10.9	2	2	2	1.463	1.297	1.1	0.882	0.983	0.828
A0A286ZWM7	Uncharacterized protein OS=Sus scrofa OX=9823	0.833	Down	0.0061579	---	30.688	4.6524	3.8	1	2	1	0.836	0.794	0.891	1.01	0.991	1.026
A0A286ZWP6	Uncharacterized protein OS=Sus scrofa OX=9823 GN=DNAJB6	1.325	Up	0.033276	DNAJB6	36.218	23.125	22.2	8	12	7	1.195	1.04	1.01	0.813	0.811	0.825
A0A286ZX62	"TPX2, microtubule nucleation factor OS=Sus scrofa OX=9823 GN=TPX2"	1.741	Up	0.0075225	TPX2	80.753	5.5151	5.5	4	4	4	0.903	1.243	1.166	0.698	0.611	0.593
A0A286ZXA0	Insulin-like growth factor-binding protein 7 precursor OS=Sus scrofa OX=9823 GN=IGFBP7	0.6	Down	0.0068964	IGFBP7	29.003	61.552	42.2	10	12	10	0.947	0.729	0.683	1.266	1.353	1.312
A0A286ZXU2	Uncharacterized protein OS=Sus scrofa OX=9823 GN=FLNA	0.46	Down	3.8e-06	FLNA	279.88	224.99	21.4	47	58	36	0.699	0.679	0.733	1.497	1.522	1.568
A0A286ZXV3	Protein phosphatase 4 regulatory subunit 3A OS=Sus scrofa OX=9823 GN=PPP4R3A	1.32	Up	0.045978	PPP4R3A	81.113	2.1573	1.3	1	1	1	1.329	1.19	0.989	0.958	0.842	0.857
A0A286ZXY8	Squalene synthase OS=Sus scrofa OX=9823 GN=FDFT1	1.433	Up	0.00049911	FDFT1	47.76	59.545	26.6	10	27	10	1.2	1.081	1.112	0.77	0.785	0.812
A0A286ZY64	Small ArfGAP 1 OS=Sus scrofa OX=9823 GN=SMAP1	0.809	Down	0.0138632	SMAP1	44.267	4.9449	7	3	3	3	0.865	0.89	0.939	1.016	1.175	1.139
A0A286ZY74	Transmembrane protein 159 OS=Sus scrofa OX=9823 GN=TMEM159	2.884	Up	0.00126491	TMEM159	15.278	3.2481	9.1	1	2	1	1.428	1.334	1.1	0.471	0.509	0.359
A0A286ZYI8	"Lon protease homolog 2, peroxisomal OS=Sus scrofa OX=9823 GN=LONP2"	1.39	Up	0.00080131	LONP2	89.517	14.569	7.3	6	8	6	1.116	1.065	1.158	0.789	0.771	0.843
A0A286ZYJ3	"KH RNA binding domain containing, signal transduction associated 2 OS=Sus scrofa OX=9823 GN=KHDRBS2"	1.597	Up	0.0065755	KHDRBS2	33.992	2.2983	2.9	1	3	1	1.373	1.252	1.071	0.76	0.848	0.707
A0A286ZZB7	Histone cluster 1 H1 family member e OS=Sus scrofa OX=9823 GN=HIST1H1E	0.695	Down	0.00138018	HIST1H1E	21.993	11.277	23.7	6	9	3	0.856	0.788	0.897	1.262	1.235	1.157
A0A286ZZV5	Microtubule-associated protein OS=Sus scrofa OX=9823 GN=MAPT	0.36	Down	0.005798	MAPT	38.759	4.5738	9.9	3	3	3	0.442	0.505	0.82	1.477	1.63	1.805
A0A287A018	Protein C10 OS=Sus scrofa OX=9823 GN=C12orf57	0.77	Down	0.043721	C12orf57	13.138	5.7589	17.5	2	2	2	1.088	0.993	0.836	1.3	1.146	1.344
A0A287A0D3	Sodium channel and clathrin linker 1 OS=Sus scrofa OX=9823 GN=SCLT1	1.44	Up	0.0042151	SCLT1	77.935	78.139	16.4	11	16	11	1.001	1.216	1.099	0.806	0.756	0.74
A0A287A0I0	"Protein phosphatase 3 regulatory subunit B, alpha OS=Sus scrofa OX=9823 GN=PPP3R1"	0.756	Down	0.0060206	PPP3R1	16.945	3.0308	6.7	1	2	1	0.989	0.856	0.934	1.301	1.17	1.203
A0A287A0S2	Uncharacterized protein OS=Sus scrofa OX=9823 GN=ATF7	0.661	Down	0.002124	ATF7	46.434	13.226	9.7	4	5	4	0.881	0.825	0.794	1.173	1.223	1.385
A0A287A0U2	Pitrilysin metallopeptidase 1 OS=Sus scrofa OX=9823 GN=PITRM1	1.218	Up	5.55e-05	PITRM1	101.18	60.53	19.3	17	17	17	1.106	1.099	1.1	0.904	0.921	0.888
A0A287A0W8	Uncharacterized protein OS=Sus scrofa OX=9823	2.005	Up	0.002684	---	155.91	2.3025	0.7	1	1	1	1.437	1.181	1.275	0.767	0.585	0.59
A0A287A1J6	Uncharacterized protein OS=Sus scrofa OX=9823	0.776	Down	0.0040584	---	12.241	44.011	23.9	2	7	1	0.807	0.86	0.922	1.076	1.111	1.15
A0A287A1W3	Tyrosine-protein kinase receptor OS=Sus scrofa OX=9823 GN=INSRR	1.507	Up	0.0123566	INSRR	144.14	-2	1.1	1	1	1	0.812	0.652	0.603	0.434	0.464	0.474
A0A287A225	Diphosphomevalonate decarboxylase OS=Sus scrofa OX=9823 GN=MVD	0.741	Down	0.025456	MVD	38.215	2.2765	2.6	1	1	1	0.781	1.015	0.88	1.283	1.107	1.22
A0A287A2K8	Ankyrin repeat and LEM domain containing 2 OS=Sus scrofa OX=9823 GN=ANKLE2	1.391	Up	0.011641	ANKLE2	96.336	3.2799	2.4	2	2	2	1.184	1.04	1.055	0.834	0.834	0.69
A0A287A2P3	YTH N6-methyladenosine RNA binding protein 1 OS=Sus scrofa OX=9823 GN=YTHDF1	0.683	Down	0.003481	YTHDF1	60.124	9.7508	9	5	5	3	0.798	0.975	0.897	1.248	1.317	1.343
A0A287A2Q2	Pleckstrin homology domain containing A7 OS=Sus scrofa OX=9823 GN=PLEKHA7	0.598	Down	0.0037219	PLEKHA7	131.79	49.882	14.7	17	18	17	0.819	0.751	0.83	1.344	1.329	1.343
A0A287A2R5	Cytosolic arginine sensor for mTORC1 subunit 1 OS=Sus scrofa OX=9823 GN=CASTOR1	1.801	Up	0.0003214	CASTOR1	29.705	20.556	10.5	2	2	2	1.292	1.237	1.1	0.655	0.667	0.693
A0A287A3M4	Protein kinase cAMP-dependent type II regulatory subunit beta OS=Sus scrofa OX=9823 GN=PRKAR2B	0.471	Down	4.17e-05	PRKAR2B	24.263	4.0789	11.3	2	2	1	0.691	0.731	0.741	1.634	1.483	1.478
A0A287A4F2	Splicing factor proline and glutamine rich OS=Sus scrofa OX=9823 GN=SFPQ	0.825	Down	0.0101806	SFPQ	75.502	63.835	18.5	11	16	10	0.894	0.951	1.002	1.116	1.21	1.123
A0A287A4L7	"Poly(A) binding protein nuclear 1 like, cytoplasmic OS=Sus scrofa OX=9823 GN=PABPN1L"	2.357	Up	0.022098	PABPN1L	29.686	44.428	10.1	2	2	2	1.667	1.352	0.856	0.638	0.576	0.43
A0A287A4P9	Ubiquitin carboxyl-terminal hydrolase 16 OS=Sus scrofa OX=9823 GN=USP16	0.737	Down	0.0143641	USP16	88.005	8.3961	4.8	4	4	4	1.007	0.88	0.819	1.247	1.298	1.125
A0A287A4W6	"RAB21, member RAS oncogene family OS=Sus scrofa OX=9823 GN=RAB21"	1.298	Up	0.0132246	RAB21	24.132	40.224	10.4	2	5	2	1.237	1.118	1.007	0.863	0.846	0.882
A0A287A5X1	Cell division cycle 27 OS=Sus scrofa OX=9823 GN=CDC27	1.699	Up	0.0189448	CDC27	88.993	8.7504	2.5	2	2	2	0.936	1.242	1.294	0.559	0.742	0.742
A0A287A5X5	Coatomer subunit gamma OS=Sus scrofa OX=9823 GN=COPG2	2.094	Up	0.0043777	COPG2	89.152	7.232	5.9	4	6	4	1.458	1.039	1.371	0.534	0.634	0.679
A0A287A6Z8	"LLGL1, scribble cell polarity complex component OS=Sus scrofa OX=9823 GN=LLGL1"	2.035	Up	2.6e-06	LLGL1	111.92	56.364	14.8	11	12	11	1.263	1.237	1.268	0.641	0.598	0.613
A0A287A7J6	Erythroid differentiation regulatory factor 1 OS=Sus scrofa OX=9823 GN=EDRF1	1.467	Up	0.0028011	EDRF1	133.07	11.322	5.2	6	6	6	0.98	1.113	1.166	0.775	0.739	0.708
A0A287A837	Leucine zipper and CTNNBIP1 domain containing OS=Sus scrofa OX=9823 GN=LZIC	1.221	Up	0.0089221	LZIC	20.165	9.6212	17.8	4	5	4	0.989	1.103	1.098	0.844	0.908	0.861
A0A287A853	G protein subunit alpha 13 OS=Sus scrofa OX=9823 GN=GNA13	0.685	Down	0.0025849	GNA13	44.028	9.2799	9.5	4	4	4	0.906	0.824	0.832	1.248	1.349	1.144
A0A287A8G0	DNA (cytosine-5)-methyltransferase OS=Sus scrofa OX=9823 GN=DNMT1	1.94	Up	1.84e-06	DNMT1	181.95	323.31	47.6	79	284	79	1.153	1.184	1.161	0.611	0.611	0.581
A0A287A8U7	Uncharacterized protein OS=Sus scrofa OX=9823	0.711	Down	0.00034394	---	23.144	224.18	43.2	8	23	5	0.898	0.849	0.834	1.168	1.208	1.253
A0A287A8W9	Septin-2 OS=Sus scrofa OX=9823 GN=SEPT2	1.293	Up	0.00184205	2-Sep	40.514	75.35	27.3	8	12	8	1.066	1.118	1.008	0.818	0.851	0.8
A0A287A8X0	SH3 and PX domains 2A OS=Sus scrofa OX=9823 GN=SH3PXD2A	4.201	Up	3.14e-07	SH3PXD2A	105.64	3.951	2	2	2	2	1.356	1.283	1.36	0.319	0.326	0.307
A0A287A964	HECT and RLD domain containing E3 ubiquitin protein ligase 4 OS=Sus scrofa OX=9823 GN=HERC4	1.252	Up	0.039938	HERC4	114.09	42.492	13.1	12	16	12	1.186	0.987	1.105	0.804	0.853	0.961
A0A287A9D6	Transmembrane protein 50B OS=Sus scrofa OX=9823 GN=TMEM50B	0.592	Down	0.031299	TMEM50B	17.936	2.0338	7	1	1	1	0.976	0.711	0.562	1.26	1.155	1.381
A0A287A9H4	Heterogeneous nuclear ribonucleoprotein F OS=Sus scrofa OX=9823 GN=HNRNPF	1.484	Up	0.022235	HNRNPF	42.478	56.347	20.4	7	13	6	1.361	0.997	1.044	0.814	0.778	0.7
A0A287A9P3	"Myosin light chain kinase, smooth muscle OS=Sus scrofa OX=9823 GN=MYLK"	0.626	Down	0.00172257	MYLK	194.76	21.299	4.7	8	9	8	0.855	0.958	0.795	1.444	1.42	1.302
A0A287A9S9	Golgin A5 OS=Sus scrofa OX=9823 GN=GOLGA5	1.263	Up	0.0084193	GOLGA5	71.804	59.721	27.8	16	17	16	1.187	1.056	1.051	0.826	0.906	0.876
A0A287A9T8	Uncharacterized protein OS=Sus scrofa OX=9823 GN=CETN2	1.679	Up	0.0110217	CETN2	24.708	9.868	22.3	5	6	5	0.898	1.166	1.31	0.694	0.655	0.661
A0A287AA04	Nuclear prelamin A recognition factor OS=Sus scrofa OX=9823 GN=NARF	0.634	Down	0.046097	NARF	43.215	4.7511	3.1	1	1	1	0.97	0.868	0.604	1.091	1.429	1.334
A0A287AAY5	"Afadin, adherens junction formation factor OS=Sus scrofa OX=9823 GN=AFDN"	0.691	Down	0.0181791	AFDN	177.86	19.717	3.4	5	5	5	1.061	0.771	0.858	1.286	1.367	1.241
A0A287AB59	Plexin B2 OS=Sus scrofa OX=9823 GN=PLXNB2	0.675	Down	0.0166007	PLXNB2	180.41	1.818	1	2	2	2	0.734	0.814	0.966	1.203	1.135	1.388
A0A287AB69	Abnormal spindle microtubule assembly OS=Sus scrofa OX=9823 GN=ASPM	1.406	Up	0.00159531	ASPM	350.94	56.139	4.6	12	12	12	1.107	1.164	1.079	0.849	0.792	0.742
A0A287ABC9	Protein tyrosine kinase 2 OS=Sus scrofa OX=9823 GN=PTK2	0.822	Down	0.00177865	PTK2	105.87	5.1121	2.9	3	3	3	0.936	0.925	0.869	1.083	1.106	1.134
A0A287ABG2	Proliferating cell nuclear antigen OS=Sus scrofa OX=9823 GN=PCNA	1.715	Up	0.0162982	PCNA	28.779	191.68	48.3	12	72	12	0.942	1.18	1.13	0.627	0.635	0.634
A0A287ABI4	Uncharacterized protein OS=Sus scrofa OX=9823 GN=LOC110257335	2.57	Up	0.0046387	LOC110257335	28.751	36.497	21.7	4	5	4	1.049	1.461	1.64	0.444	0.605	0.566
A0A287ABL2	Phosphatidate phosphatase LPIN2 OS=Sus scrofa OX=9823 GN=LPIN2	0.766	Down	0.0043367	LPIN2	98.94	70.086	17.8	14	18	14	0.925	0.843	0.977	1.186	1.166	1.233
A0A287AC49	Dedicator of cytokinesis 7 OS=Sus scrofa OX=9823 GN=DOCK7	0.752	Down	0.03734	DOCK7	260.1	7.6564	2	5	5	4	0.831	0.789	1.043	1.15	1.277	1.116
A0A287ACN2	Adipogenesis regulatory factor OS=Sus scrofa OX=9823 GN=ADIRF	0.804	Down	0.024918	ADIRF	7.7876	21.403	29.3	2	3	2	0.813	0.945	0.925	1.164	1.023	1.148
A0A287ACQ4	Catenin beta-1 OS=Sus scrofa OX=9823 GN=CTNNB1	1.365	Up	0.000405	CTNNB1	84.146	92.708	19.3	14	29	14	1.102	1.125	1.074	0.777	0.795	0.846
A0A287AD32	YTH N6-methyladenosine RNA binding protein 2 OS=Sus scrofa OX=9823 GN=YTHDF2	0.594	Down	1.73e-05	YTHDF2	56.941	22.288	14.2	7	9	5	0.792	0.835	0.792	1.378	1.329	1.362
A0A287ADE6	Ribosomal protein S15a OS=Sus scrofa OX=9823 GN=RPS15A	0.783	Down	0.022421	RPS15A	14.839	3.4973	12.3	2	6	2	0.769	0.931	0.937	1.086	1.11	1.17
A0A287ADL8	26S proteasome non-ATPase regulatory subunit 4 OS=Sus scrofa OX=9823 GN=PSMD4	1.31	Up	0.00046495	PSMD4	38.097	75.512	23.2	7	13	1	1.164	1.251	1.201	0.943	0.922	0.895
A0A287AE24	Uncharacterized protein OS=Sus scrofa OX=9823	0.761	Down	0.046022	---	23.512	150.05	32.7	5	13	4	0.732	0.879	0.88	1.087	1.104	1.082
A0A287AEK9	WD repeat domain 19 OS=Sus scrofa OX=9823 GN=WDR19	1.466	Up	0.00086176	WDR19	145.18	25.958	9.4	12	13	12	1.195	1.058	1.116	0.732	0.795	0.771
A0A287AEV6	CD99 molecule (Xg blood group) OS=Sus scrofa OX=9823 GN=CD99	0.55	Down	0.0065178	CD99	18.588	17.363	19.2	2	2	2	0.641	0.87	0.929	1.514	1.403	1.519
A0A287AF08	Selenoprotein H OS=Sus scrofa OX=9823 GN=SELENOH	1.261	Up	0.026265	SELENOH	13.388	4.6972	17.2	2	3	2	1.021	0.992	1.181	0.783	0.851	0.898
A0A287AFB9	U2 snRNP auxiliary factor large subunit OS=Sus scrofa OX=9823 GN=U2AF2	1.595	Up	0.00153807	U2AF2	51.532	4.0351	3.9	2	3	2	1.127	1.133	1.033	0.671	0.759	0.634
A0A287AFN2	Thymidylate synthase OS=Sus scrofa OX=9823 GN=TYMS	1.895	Up	0.00042076	TYMS	42.168	49.537	21.3	7	12	7	1.317	1.111	1.123	0.636	0.64	0.598
A0A287AG68	Uncharacterized protein OS=Sus scrofa OX=9823	0.632	Down	0.022557	---	22.486	12.492	5.7	1	1	1	0.78	0.869	0.593	1.041	1.243	1.265
A0A287AGS3	Pleckstrin homology and RhoGEF domain containing G1 OS=Sus scrofa OX=9823 GN=PLEKHG1	0.783	Down	0.0043556	PLEKHG1	152.96	20.792	6.5	9	12	9	1.005	0.9	0.897	1.227	1.148	1.205
A0A287AGZ9	Riboflavin kinase OS=Sus scrofa OX=9823 GN=RFK	1.611	Up	0.0023593	RFK	16.756	4.5624	12.2	2	2	2	0.976	1.146	1.176	0.734	0.659	0.654
A0A287AH59	Syntaxin 3 OS=Sus scrofa OX=9823 GN=STX3	1.399	Up	0.0048213	STX3	30.2	7.5164	14.5	4	4	4	1.07	1.041	1.084	0.717	0.713	0.853
A0A287AHM8	Torsin 1A interacting protein 1 OS=Sus scrofa OX=9823 GN=TOR1AIP1	1.28	Up	0.042819	TOR1AIP1	64.993	6.9826	5.2	3	3	3	1.061	1.039	1.009	0.868	0.883	0.678
A0A287AHM9	Uncharacterized protein OS=Sus scrofa OX=9823 GN=TJP1	0.688	Down	0.0046563	TJP1	196.55	34.733	7.8	12	12	12	0.77	0.922	0.947	1.309	1.267	1.258
A0A287AHN8	Methyltransferase like 14 OS=Sus scrofa OX=9823 GN=METTL14	1.523	Up	0.0181577	METTL14	48.599	4.6984	4.8	2	3	2	1.007	0.91	1.113	0.595	0.602	0.793
A0A287AHP4	Kinesin-like protein OS=Sus scrofa OX=9823 GN=KIF18A	1.8	Up	0.000115378	KIF18A	88.537	4.9529	4	3	3	3	1.034	1.008	1.113	0.594	0.556	0.603
A0A287AHQ4	Tudor domain-containing protein 10 OS=Sus scrofa OX=9823 GN=TDRD10	0.586	Down	0.0180377	TDRD10	37.482	2.3746	6.4	2	2	2	0.884	0.714	0.892	1.444	1.399	1.405
A0A287AIA3	Yes associated protein 1 OS=Sus scrofa OX=9823 GN=YAP1	1.459	Up	0.0031205	YAP1	45.539	23.711	14.7	5	6	5	0.944	1.074	1.136	0.72	0.694	0.748
A0A287AID2	Tropomyosin alpha-3 chain OS=Sus scrofa OX=9823 GN=TPM3	0.546	Down	0.00048173	TPM3	32.929	37.147	43.7	14	22	6	0.863	0.739	0.716	1.41	1.441	1.394
A0A287AID7	Ceramide synthase 5 OS=Sus scrofa OX=9823 GN=CERS5	0.707	Down	0.0148596	CERS5	39.482	22.093	5.8	2	3	2	0.864	0.923	0.698	1.208	1.167	1.138
A0A287AIK8	C-terminal binding protein 2 OS=Sus scrofa OX=9823 GN=CTBP2	1.449	Up	0.03432	CTBP2	48.958	9.2294	8.8	4	5	2	1.298	1.115	1.026	0.78	0.807	0.787
A0A287AIM5	CCHC-type zinc finger nucleic acid binding protein OS=Sus scrofa OX=9823 GN=CNBP	0.725	Down	0.007903	CNBP	18.742	29.305	38.2	6	11	6	0.783	0.902	0.913	1.245	1.244	1.094
A0A287AIR8	Nischarin OS=Sus scrofa OX=9823 GN=NISCH	0.777	Down	0.040796	NISCH	153.1	9.9502	4.3	6	6	6	0.736	0.926	0.957	1.065	1.15	1.156
A0A287AIX8	COMM domain-containing protein 6 OS=Sus scrofa OX=9823 GN=COMMD6	1.207	Up	0.034523	COMMD6	9.7141	6.7165	23.5	2	2	2	1.154	1.048	0.997	0.899	0.815	0.937
A0A287AJ27	CD276 molecule OS=Sus scrofa OX=9823 GN=CD276	0.537	Down	0.00025563	CD276	56.425	2.716	3.8	1	3	1	0.739	0.816	0.764	1.367	1.559	1.391
A0A287AJ83	Dynein cytoplasmic 2 light intermediate chain 1 OS=Sus scrofa OX=9823 GN=DYNC2LI1	3.232	Up	0.00101828	DYNC2LI1	39.664	4.1555	6.3	2	3	2	0.898	1.311	1.223	0.31	0.395	0.357
A0A287AJ95	Exportin 4 OS=Sus scrofa OX=9823 GN=XPO4	1.368	Up	0.023685	XPO4	106.6	1.5592	0.7	1	1	1	1.256	1.009	1.061	0.725	0.882	0.825
A0A287AJB4	U2 small nuclear RNA auxiliary factor 1 like 5 OS=Sus scrofa OX=9823 GN=U2AF1L5	3.024	Up	0.0022224	U2AF1L5	27.815	47.019	17.6	4	6	4	1.487	1.065	1.137	0.468	0.315	0.437
A0A287AJH6	Dopey family member 1 OS=Sus scrofa OX=9823 GN=DOPEY1	0.718	Down	0.0018168	DOPEY1	275.45	15.696	4	11	13	10	0.795	0.889	0.91	1.207	1.167	1.24
A0A287AJW9	Hydrogen voltage gated channel 1 OS=Sus scrofa OX=9823 GN=HVCN1	1.426	Up	0.00019556	HVCN1	29.594	4.7001	8.7	2	2	2	1.139	1.094	1.11	0.77	0.819	0.756
A0A287AJX6	ArfGAP with FG repeats 1 OS=Sus scrofa OX=9823 GN=AGFG1	0.804	Down	0.03322	AGFG1	52.692	35.405	14.9	8	10	8	0.771	0.951	0.933	1.101	1.139	1.064
A0A287AKA2	Aminoacyl tRNA synthase complex-interacting multifunctional protein 1 OS=Sus scrofa OX=9823 GN=AIMP1	0.81	Down	0.0040356	AIMP1	34.324	98.701	34.4	11	15	11	0.859	0.942	0.927	1.084	1.118	1.167
A0A287AKA3	Core histone macro-H2A OS=Sus scrofa OX=9823 GN=H2AFY2	1.278	Up	0.0133983	H2AFY2	40.044	-2	1.9	1	2	1	1.151	0.963	0.983	0.813	0.819	0.791
A0A287AKN4	Kinesin family member 15 OS=Sus scrofa OX=9823 GN=KIF15	1.343	Up	0.029603	KIF15	157.67	44.531	13.8	18	18	18	1.257	1.004	1.132	0.783	0.796	0.947
A0A287AKP7	Ribosomal protein S6 kinase OS=Sus scrofa OX=9823 GN=RPS6KA4	2.739	Up	0.0073367	RPS6KA4	82.837	2.1497	1.1	1	2	1	0.778	1.114	1.447	0.426	0.348	0.445
A0A287AL99	Sad1 and UNC84 domain containing 1 OS=Sus scrofa OX=9823 GN=SUN1	1.367	Up	0.003505	SUN1	74.885	6.8073	5.8	4	4	4	1.019	1.188	1.094	0.838	0.771	0.806
A0A287ALJ6	Uncharacterized protein OS=Sus scrofa OX=9823	0.43	Down	7.76e-05	---	17.07	33.779	20.5	3	5	2	0.662	0.614	0.596	1.48	1.534	1.343
A0A287AM78	Purine nucleoside phosphorylase OS=Sus scrofa OX=9823 GN=PNP	1.543	Up	0.0012822	PNP	32.042	151	51	13	36	13	1.292	1.129	1.099	0.771	0.732	0.778
A0A287AML7	Leucine rich repeat containing 42 OS=Sus scrofa OX=9823 GN=LRRC42	1.595	Up	0.0068363	LRRC42	43.23	3.7239	4.7	2	2	2	0.955	1.275	1.2	0.724	0.693	0.733
A0A287AMX6	Atlastin GTPase 2 OS=Sus scrofa OX=9823 GN=ATL2	1.855	Up	7.83e-05	ATL2	62.522	16.871	17.4	8	8	7	1.062	1.196	1.159	0.608	0.627	0.607
A0A287ANE9	Serine/threonine kinase 38 OS=Sus scrofa OX=9823 GN=STK38	1.746	Up	0.00187526	STK38	47.431	6.4863	6.9	3	3	2	1.096	1.117	1.273	0.648	0.743	0.605
A0A287AP19	Eukaryotic translation initiation factor 4E type 2 OS=Sus scrofa OX=9823 GN=EIF4E2	0.68	Down	0.005583	EIF4E2	26.674	19.081	14.2	3	4	3	0.942	0.824	0.74	1.198	1.269	1.218
A0A287AP27	Cyclin-dependent kinase 9 OS=Sus scrofa OX=9823 GN=CDK9	1.319	Up	0.04606	CDK9	37.001	8.1098	10.3	3	3	2	0.871	1.057	1.115	0.84	0.684	0.783
A0A287AP63	U4/U6 small nuclear ribonucleoprotein Prp3 OS=Sus scrofa OX=9823 GN=PRPF3	1.298	Up	0.0123174	PRPF3	77.528	11.88	9.8	7	7	7	1.057	0.948	1.108	0.813	0.742	0.844
A0A287APF7	Kinesin-like protein OS=Sus scrofa OX=9823 GN=KIFC1	1.405	Up	0.0062566	KIFC1	60.384	6.3703	10.3	5	6	5	1.067	1.137	1.265	0.835	0.76	0.874
A0A287AQ23	Uncharacterized protein OS=Sus scrofa OX=9823 GN=DGCR6L	0.819	Down	0.010223	DGCR6L	22.747	6.8087	9.6	2	3	2	0.955	0.944	0.874	1.067	1.121	1.198
A0A287AQ88	Nuclear mitotic apparatus protein 1 OS=Sus scrofa OX=9823 GN=NUMA1	1.553	Up	0.012003	NUMA1	233.5	24.136	6.5	13	13	13	1.326	1.129	1.077	0.794	0.836	0.645
A0A287AQ96	ADP ribosylation factor GTPase activating protein 1 OS=Sus scrofa OX=9823 GN=ARFGAP1	0.783	Down	0.00032078	ARFGAP1	44.941	2.2757	2.2	1	1	1	0.944	0.899	0.909	1.175	1.139	1.2
A0A287AQG4	Synaptotagmin binding cytoplasmic RNA interacting protein OS=Sus scrofa OX=9823 GN=SYNCRIP	1.327	Up	0.047805	SYNCRIP	62.656	54.883	23.8	13	23	1	1.317	1.225	1.123	1.073	0.907	0.781
A0A287AQT0	Replication factor C subunit 4 OS=Sus scrofa OX=9823 GN=RFC4	1.317	Up	0.0176812	RFC4	32.792	5.0203	9.7	3	3	3	0.964	1.099	1.093	0.86	0.713	0.824
A0A287AQW0	Myosin phosphatase Rho interacting protein OS=Sus scrofa OX=9823 GN=MPRIP	0.548	Down	0.000144558	MPRIP	110.23	12.857	7.6	8	9	8	0.769	0.817	0.71	1.378	1.377	1.436
A0A287AR09	Syntaxin-6 OS=Sus scrofa OX=9823 GN=STX6	1.631	Up	0.00139942	STX6	28.206	59.424	30	6	9	6	1.302	1.087	1.236	0.772	0.753	0.697
A0A287AR26	Uncharacterized protein OS=Sus scrofa OX=9823 GN=KIF4A	2.002	Up	2.17e-05	KIF4A	135.51	88.279	17	21	27	20	1.211	1.23	1.181	0.636	0.577	0.596
A0A287AR46	Intracellular hyaluronan-binding protein 4 OS=Sus scrofa OX=9823 GN=HABP4	0.784	Down	0.0023837	HABP4	46.143	9.1828	11	5	5	5	0.829	0.874	0.911	1.137	1.061	1.135
A0A287AR67	Sorcin isoform 2 OS=Sus scrofa OX=9823 GN=SRI	0.79	Down	0.033775	SRI	20.345	25.498	18.6	3	9	3	0.767	0.993	0.867	1.133	1.111	1.08
A0A287AR84	DNA helicase OS=Sus scrofa OX=9823 GN=MCM6	1.505	Up	5.65e-05	MCM6	89.587	53.994	16.1	12	18	12	1.11	1.148	1.114	0.745	0.722	0.773
A0A287ARE4	Myotubularin related protein 6 OS=Sus scrofa OX=9823 GN=MTMR6	0.67	Down	0.043539	MTMR6	62.367	15.838	11.1	7	8	6	0.877	0.909	0.687	1.234	1.449	1.01
A0A287ARX9	Discs large MAGUK scaffold protein 2 OS=Sus scrofa OX=9823 GN=DLG2	0.799	Down	0.0168446	DLG2	90.114	3.3859	2.3	2	2	1	0.798	0.956	0.88	1.062	1.085	1.151
A0A287ASS8	"Testis expressed 15, meiosis and synapsis associated OS=Sus scrofa OX=9823 GN=TEX15"	0.69	Down	0.00077714	TEX15	305.87	-2	0.4	1	1	1	0.825	0.777	0.863	1.239	1.132	1.202
A0A287AST9	Zygote arrest 1 like OS=Sus scrofa OX=9823 GN=ZAR1L	0.385	Down	1.59e-05	ZAR1L	41.995	67.366	41.4	14	23	14	0.642	0.641	0.616	1.705	1.694	1.539
A0A287AT51	Cell proliferation regulating inhibitor of protein phosphatase 2A OS=Sus scrofa OX=9823 GN=CIP2A	0.748	Down	0.00028103	CIP2A	102.53	37.171	6.1	6	6	6	0.864	0.906	0.897	1.215	1.143	1.209
A0A287AT83	Uncharacterized protein OS=Sus scrofa OX=9823	0.806	Down	0.00048307	---	68.963	260.8	27.5	19	28	19	0.919	0.88	0.942	1.146	1.133	1.122
A0A287ATT3	Uncharacterized protein OS=Sus scrofa OX=9823 GN=LOC100523244	1.923	Up	0.000122737	LOC100523244	43.28	28.413	20.1	7	7	6	1.219	1.144	1.108	0.571	0.592	0.642
A0A287ATW2	Protein phosphatase 1 regulatory subunit 12A OS=Sus scrofa OX=9823 GN=PPP1R12A	0.632	Down	0.0051171	PPP1R12A	80.877	9.8843	5	3	3	3	0.852	0.775	0.813	1.178	1.191	1.491
A0A287ATX4	Wiskott-Aldrich syndrome like OS=Sus scrofa OX=9823 GN=WASL	0.618	Down	0.0059987	WASL	54.641	4.6561	5.3	3	3	3	0.807	0.815	0.773	1.114	1.505	1.255
A0A287AUL4	Uncharacterized protein OS=Sus scrofa OX=9823 GN=SPATS2	0.549	Down	2.04e-05	SPATS2	59.251	75.842	20.7	10	16	10	0.818	0.767	0.769	1.401	1.414	1.472
A0A287AUN2	Methyltransferase like 3 OS=Sus scrofa OX=9823 GN=METTL3	2.011	Up	0.043658	METTL3	55.58	4.6612	6.6	3	3	3	1.759	1.165	0.956	0.463	0.752	0.714
A0A287AUR1	KIAA1217 OS=Sus scrofa OX=9823 GN=KIAA1217	1.477	Up	0.0066001	KIAA1217	132.08	-2	0.8	1	1	1	1.248	1.145	1.016	0.792	0.814	0.702
A0A287AUW4	Uncharacterized protein OS=Sus scrofa OX=9823 GN=SUB1	0.819	Down	0.0119179	SUB1	14.395	6.6318	24.4	3	6	3	0.8	0.91	0.901	1.088	1.021	1.08
A0A287AWN0	"BRCA2, DNA repair associated OS=Sus scrofa OX=9823 GN=BRCA2"	1.527	Up	0.025136	BRCA2	356.53	16.302	2.8	8	8	8	1.615	1.176	1.146	0.929	0.804	0.846
A0A287AWN6	Golgi to ER traffic protein 4 OS=Sus scrofa OX=9823 GN=GET4	1.595	Up	0.0168038	GET4	36.455	3.5117	6.1	2	3	2	1.572	1.133	1.106	0.777	0.826	0.786
A0A287AWQ9	Trafficking protein particle complex subunit OS=Sus scrofa OX=9823 GN=TRAPPC3	1.46	Up	0.0033642	TRAPPC3	20.29	6.4872	20.6	4	4	4	1.226	1.117	1.027	0.762	0.731	0.816
A0A287AWZ3	Histone H2B OS=Sus scrofa OX=9823 GN=LOC100515302	0.649	Down	0.00081688	LOC100515302	13.938	1.486	27.8	4	6	1	0.88	0.855	0.758	1.315	1.275	1.253
A0A287AX01	Mitogen-activated protein kinase OS=Sus scrofa OX=9823 GN=MAPK14	1.395	Up	0.00085599	MAPK14	39.561	20.335	12.2	4	7	2	1.096	1.046	1.099	0.731	0.821	0.771
A0A287AXM2	FYN binding protein 2 OS=Sus scrofa OX=9823 GN=FYB2	1.393	Up	0.02166	FYB2	83.724	20.173	10	7	8	7	1.216	0.998	1.154	0.869	0.85	0.699
A0A287AXZ3	CCR4-NOT transcription complex subunit 10 OS=Sus scrofa OX=9823 GN=CNOT10	0.661	Down	0.00034293	CNOT10	78.958	34.128	12.6	8	8	8	0.855	0.782	0.854	1.209	1.303	1.259
A0A287AY75	Golgi membrane protein 1 OS=Sus scrofa OX=9823 GN=GOLM1	0.725	Down	0.029124	GOLM1	44.209	7.696	7.9	3	4	3	0.74	0.96	0.943	1.248	1.099	1.301
A0A287AYF1	DCN1-like protein OS=Sus scrofa OX=9823 GN=DCUN1D5	2.235	Up	0.00027925	DCUN1D5	20.055	15.664	24.4	4	5	4	0.987	1.226	1.166	0.499	0.517	0.496
A0A287AYW5	Uncharacterized protein OS=Sus scrofa OX=9823	3.655	Up	0.0012567	---	25.708	12.056	6.2	1	2	1	1.92	1.321	1.276	0.346	0.47	0.42
A0A287AZB1	NudE neurodevelopment protein 1 OS=Sus scrofa OX=9823 GN=NDE1	0.764	Down	0.0031602	NDE1	37.713	88.002	43	13	18	12	0.867	0.929	0.804	1.156	1.128	1.121
A0A287AZY0	Mitochondrial calcium uptake 2 OS=Sus scrofa OX=9823 GN=MICU2	1.333	Up	0.0137995	MICU2	45.847	2.7185	2.5	1	2	1	1.133	1.17	1.371	0.947	0.858	0.952
A0A287B0R3	CAP-Gly domain containing linker protein 1 OS=Sus scrofa OX=9823 GN=CLIP1	1.265	Up	0.00069606	CLIP1	156.09	52.841	12.9	17	22	13	1.086	1.069	1.145	0.852	0.865	0.892
A0A287B101	Uncharacterized protein OS=Sus scrofa OX=9823 GN=TIAL1	1.281	Up	0.036002	TIAL1	37.222	19.659	12.8	4	7	4	1.266	1.073	1.044	0.958	0.882	0.801
A0A287B160	Uncharacterized protein OS=Sus scrofa OX=9823 GN=TARDBP	1.219	Up	0.026485	TARDBP	33.596	9.029	11.7	4	4	4	0.937	1.136	1.018	0.838	0.833	0.864
A0A287B167	Uncharacterized protein OS=Sus scrofa OX=9823 GN=PARL	1.273	Up	4.17e-05	PARL	45.833	23.932	11.2	6	13	6	1.083	1.045	1.045	0.835	0.824	0.833
A0A287B187	Autophagy protein 5 OS=Sus scrofa OX=9823 GN=ATG5	1.255	Up	0.0142757	ATG5	28.767	21.667	35.7	8	11	8	1.048	1.143	1.06	0.867	0.864	0.859
A0A287B1H5	Importin 8 OS=Sus scrofa OX=9823 GN=IPO8	1.811	Up	0.00089785	IPO8	113.79	9.0505	5.1	5	5	5	1.121	1.207	1.313	0.649	0.626	0.736
A0A287B1V4	Dynamin 3 OS=Sus scrofa OX=9823 GN=DNM3	0.788	Down	0.03044	DNM3	95.717	-2	7	7	9	1	0.799	0.998	0.857	1.117	1.191	1.061
A0A287B278	Annexin OS=Sus scrofa OX=9823 GN=ANXA4	0.202	Down	0.0146764	ANXA4	35.669	19.168	9.1	3	5	2	0.394	0.31	0.613	2.112	2.143	2.255
A0A287B2M8	Proline rich and Gla domain 1 OS=Sus scrofa OX=9823 GN=PRRG1	1.698	Up	0.0159831	PRRG1	22.791	2.2171	4.1	1	1	1	1.455	1.03	0.983	0.692	0.714	0.636
A0A287B388	Uncharacterized protein OS=Sus scrofa OX=9823 GN=CFH	1.297	Up	0.0069754	CFH	131.55	9.0038	5.4	7	7	7	0.966	0.876	0.979	0.72	0.681	0.774
A0A287B3E6	Zinc finger protein 182 OS=Sus scrofa OX=9823 GN=ZNF182	0.212	Down	0.00030409	ZNF182	67.382	3.3387	1.5	1	3	1	0.532	0.353	0.439	2.061	2.321	1.871
A0A287B3W8	ATP-citrate synthase isoform 2 OS=Sus scrofa OX=9823 GN=ACLY	0.664	Down	0.0034767	ACLY	110.87	6.8533	4.4	5	5	5	0.944	0.783	0.783	1.322	1.226	1.234
A0A287B435	Proline and serine rich 1 OS=Sus scrofa OX=9823 GN=PROSER1	2.856	Up	0.0059002	PROSER1	89.268	2.5132	1.1	1	1	1	1.366	1.568	1.501	0.344	0.529	0.68
A0A287B460	Single-pass membrane protein with coiled-coil domains 4 OS=Sus scrofa OX=9823 GN=SMCO4	2.146	Up	0.000298	SMCO4	6.724	-2	11.9	1	1	1	1.286	1.156	1.197	0.515	0.626	0.555
A0A287B4N8	Uncharacterized protein OS=Sus scrofa OX=9823 GN=MARCKSL1	0.781	Down	0.0106352	MARCKSL1	19.647	13.353	16.4	3	5	3	0.824	0.961	0.973	1.21	1.156	1.166
A0A287B5E5	Uncharacterized protein OS=Sus scrofa OX=9823 GN=LOC110257945	0.804	Down	0.00128384	LOC110257945	25.073	1.873	3.1	1	1	1	0.831	0.905	0.893	1.102	1.081	1.086
A0A287B5J8	Follistatin like 3 OS=Sus scrofa OX=9823 GN=FSTL3	0.762	Down	0.0062957	FSTL3	30.771	22.778	18.2	5	6	5	0.835	0.754	0.759	1.098	0.957	1.025
A0A287B636	Alpha-galactosidase OS=Sus scrofa OX=9823 GN=GLA	2.104	Up	0.0008151	GLA	48.998	10.18	9	3	4	3	0.997	1.222	1.251	0.573	0.567	0.509
A0A287B661	Anillin actin binding protein OS=Sus scrofa OX=9823 GN=ANLN	2.062	Up	6.38e-05	ANLN	121.9	81.837	15.7	16	22	16	1.306	1.182	1.213	0.585	0.576	0.634
A0A287B6M5	Uncharacterized protein OS=Sus scrofa OX=9823	2.438	Up	0.000157255	---	17.45	1.6756	6.4	1	1	1	1.261	1.338	1.107	0.48	0.534	0.506
A0A287B6W6	Epithelial splicing regulatory protein 1 OS=Sus scrofa OX=9823 GN=ESRP1	0.469	Down	2.86e-06	ESRP1	73.423	102.29	20.2	12	19	12	0.721	0.761	0.74	1.629	1.572	1.532
A0A287B7J4	Centrosomal protein 164 OS=Sus scrofa OX=9823 GN=CEP164	0.417	Down	0.0020387	CEP164	122.33	7.3207	3.9	4	4	4	0.513	0.69	0.719	1.704	1.371	1.533
A0A287B7Z3	Nucleolar and spindle associated protein 1 OS=Sus scrofa OX=9823 GN=NUSAP1	1.937	Up	0.00085802	NUSAP1	49.722	5.7328	7.3	3	3	3	1.138	1.298	1.062	0.558	0.598	0.65
A0A287B810	ELAV-like protein OS=Sus scrofa OX=9823 GN=ELAVL2	0.54	Down	9.66e-05	ELAVL2	34.518	73.044	42.1	11	17	10	0.842	0.766	0.751	1.46	1.412	1.495
A0A287B811	Caspase 6 OS=Sus scrofa OX=9823 GN=CASP6	2.31	Up	0.000178117	CASP6	26.803	14.041	9.6	2	2	2	1.212	1.36	1.478	0.576	0.566	0.611
A0A287B858	Kinesin family member 14 OS=Sus scrofa OX=9823 GN=KIF14	1.39	Up	0.0165007	KIF14	174.3	21.581	7.8	12	12	12	1.31	1.106	1.024	0.88	0.822	0.772
A0A287B8I3	Uncharacterized protein OS=Sus scrofa OX=9823 GN=FAM107B	1.417	Up	0.0070642	FAM107B	15.529	17.184	22.1	3	4	3	1.01	1.193	1.254	0.785	0.831	0.824
A0A287B8Q9	Very low-density lipoprotein receptor precursor OS=Sus scrofa OX=9823 GN=VLDLR	0.494	Down	0.00043884	VLDLR	88.796	26.234	7.6	6	6	6	0.681	0.745	0.82	1.404	1.6	1.541
A0A287B8Z7	DExH-box helicase 30 OS=Sus scrofa OX=9823 GN=DHX30	1.215	Up	0.0141571	DHX30	130.44	13.502	7	8	8	8	1.24	1.09	1.095	0.966	0.905	0.948
A0A287B922	EH domain binding protein 1 OS=Sus scrofa OX=9823 GN=EHBP1	0.671	Down	0.03958	EHBP1	120.47	6.4025	4.3	4	4	4	0.855	0.683	1.087	1.277	1.246	1.387
A0A287B9L0	Nucleoporin 214 OS=Sus scrofa OX=9823 GN=NUP214	1.721	Up	0.0050807	NUP214	194.8	323.31	27.9	43	77	43	1.081	1.234	1.167	0.678	0.678	0.667
A0A287B9T5	Uncharacterized protein OS=Sus scrofa OX=9823 GN=CBX3	1.293	Up	0.041925	CBX3	19.678	43.718	35.8	6	6	5	0.942	1.183	1.227	0.835	0.866	0.892
A0A287BA78	Cytochrome b5 type B OS=Sus scrofa OX=9823 GN=CYB5B	1.336	Up	0.025042	CYB5B	16.199	20.903	36.8	5	8	5	1.331	1.074	1.123	0.883	0.955	0.803
A0A287BAN5	Sodium/potassium-transporting ATPase subunit beta OS=Sus scrofa OX=9823 GN=ATP1B3	0.66	Down	0.0120568	ATP1B3	25.074	4.4775	5.9	1	2	1	0.732	0.931	0.868	1.425	1.263	1.145
A0A287BAS4	SR-related CTD associated factor 8 OS=Sus scrofa OX=9823 GN=SCAF8	1.226	Up	0.0071988	SCAF8	117	2.3499	1.9	2	2	2	0.993	1.022	1.067	0.808	0.809	0.897
A0A287BAU6	LSM family member 14B OS=Sus scrofa OX=9823 GN=LSM14B	0.83	Down	0.00168428	LSM14B	53.812	323.01	46.2	22	43	20	0.935	0.89	0.948	1.079	1.134	1.129
A0A287BB73	Uncharacterized protein OS=Sus scrofa OX=9823 GN=CCDC88C	0.6	Down	2.17e-05	CCDC88C	206.96	37.264	7.9	15	16	15	0.772	0.744	0.798	1.276	1.268	1.312
A0A287BBE2	Signal transducer and activator of transcription OS=Sus scrofa OX=9823 GN=STAT3	1.463	Up	0.000483	STAT3	81.238	15.017	8.5	6	8	6	1.168	1.123	1.074	0.805	0.732	0.763
A0A287BBF8	Mediator of RNA polymerase II transcription subunit 6 OS=Sus scrofa OX=9823 GN=MED6	1.731	Up	0.022461	MED6	28.435	3.9035	8.5	2	2	2	1.318	1.04	1.194	0.552	0.62	0.88
A0A287BBS5	Aurora kinase C OS=Sus scrofa OX=9823 GN=AURKC	1.266	Up	0.0107022	AURKC	34.226	46.243	23.2	6	8	6	0.913	0.865	1.019	0.731	0.715	0.763
A0A287BBS6	Catenin delta 1 OS=Sus scrofa OX=9823 GN=CTNND1	1.435	Up	0.0093846	CTNND1	104.02	241.2	23.5	18	24	18	1.112	1.116	1.118	0.73	0.777	0.825
A0A287BBW0	"ATP-binding cassette, sub-family B (MDR/TAP), member 1 OS=Sus scrofa OX=9823 GN=ABCB1"	1.256	Up	0.000117571	ABCB1	134.44	69.013	20.6	25	38	25	1.079	1.053	1.101	0.872	0.853	0.85
A0A287BCD1	Adhesion regulating molecule 1 OS=Sus scrofa OX=9823 GN=ADRM1	0.808	Down	0.009277	ADRM1	24.228	50.877	17.1	4	8	4	0.968	1	0.885	1.242	1.143	1.147
A0A287BDF9	Olfactory receptor OS=Sus scrofa OX=9823	1.34	Up	0.0010026	---	34.823	2.0245	2.6	1	1	1	1.092	1.078	1.153	0.819	0.792	0.869
A0A287BDG5	Kinesin family member 20B OS=Sus scrofa OX=9823 GN=KIF20B	2.071	Up	0.020284	KIF20B	203.13	37.962	10	18	20	18	0.753	1.308	1.267	0.477	0.576	0.554
A0A287BDL1	H/ACA ribonucleoprotein complex subunit 4 OS=Sus scrofa OX=9823 GN=DKC1	0.824	Down	0.022601	DKC1	53.292	1.806	3.5	2	2	2	0.822	0.988	0.893	1.112	1.07	1.098
A0A287BDY2	MIS18 kinetochore protein A OS=Sus scrofa OX=9823 GN=MIS18A	1.319	Up	0.0135556	MIS18A	26.433	4.8235	9.3	2	2	2	1.153	1.083	1.289	0.832	0.959	0.881
A0A287BES3	Transmembrane protein 33 OS=Sus scrofa OX=9823 GN=TMEM33	2.107	Up	0.000196214	TMEM33	27.793	3.9313	7.7	2	4	2	1.388	1.207	1.241	0.605	0.647	0.569
A0A287BF57	"MTSS1, I-BAR domain containing OS=Sus scrofa OX=9823 GN=MTSS1"	2.167	Up	0.00187832	MTSS1	75.334	8.8814	3.5	2	2	2	1.717	1.236	1.344	0.686	0.682	0.615
A0A287BFW1	Sodium/glucose cotransporter 5 OS=Sus scrofa OX=9823 GN=PRPSAP2	1.35	Up	0.048478	PRPSAP2	37.966	35.91	15.9	6	11	5	1.351	1.012	1.022	0.83	0.775	0.902
A0A287BG41	Serine/arginine repetitive matrix protein 2 OS=Sus scrofa OX=9823 GN=SRRM2	0.491	Down	0.0036417	SRRM2	269.23	4.0602	1.1	2	3	2	0.695	0.779	0.542	1.457	1.239	1.411
A0A287BG47	Clathrin light chain OS=Sus scrofa OX=9823 GN=CLTB	0.803	Down	0.00081848	CLTB	23.182	5.936	12.8	3	3	3	0.832	0.901	0.877	1.096	1.074	1.079
A0A287BG65	Sperm specific antigen 2 OS=Sus scrofa OX=9823 GN=SSFA2	2.251	Up	0.00034341	SSFA2	126.97	50.049	10	11	13	11	1.141	1.238	1.312	0.574	0.484	0.582
A0A287BG81	Synergin gamma OS=Sus scrofa OX=9823 GN=SYNRG	0.744	Down	0.00181928	SYNRG	141.03	45.705	11.3	15	18	15	0.834	0.917	0.948	1.197	1.241	1.192
A0A287BGC9	Uncharacterized protein OS=Sus scrofa OX=9823 GN=NDRG3	1.274	Up	0.0078778	NDRG3	34.792	6.5548	21.1	7	14	1	1.212	1.118	1.167	0.846	0.914	0.984
A0A287BGE0	LYR motif containing 7 OS=Sus scrofa OX=9823 GN=LYRM7	1.262	Up	0.00076319	LYRM7	11.922	5.2641	16.3	1	2	1	1.179	1.219	1.155	0.947	0.965	0.903
A0A287BH67	Serine/arginine-rich splicing factor 4 OS=Sus scrofa OX=9823 GN=SRSF4	3.339	Up	0.0060015	SRSF4	55.381	1.8172	6.9	3	3	1	1.872	1.025	2.032	0.513	0.506	0.457
A0A287BHP0	Uncharacterized protein OS=Sus scrofa OX=9823 GN=LOC100154647	2.63	Up	0.00046305	LOC100154647	17.435	8.9262	21.7	4	7	3	1.478	1.186	1.181	0.523	0.502	0.437
A0A287BHP4	Integrin beta OS=Sus scrofa OX=9823 GN=ITGB5	0.828	Down	0.020501	ITGB5	85.072	21.307	13.5	9	9	9	0.898	0.841	0.901	1.092	0.971	1.126
A0A287BHZ9	Calcium/calmodulin-dependent protein kinase type 1 OS=Sus scrofa OX=9823 GN=CAMK1	1.496	Up	0.031465	CAMK1	34.378	6.0609	6.5	2	4	2	1.508	1.046	1.073	0.817	0.832	0.775
A0A287BIN4	Fibronectin type III and SPRY domain containing 1 OS=Sus scrofa OX=9823 GN=FSD1	0.559	Down	5.58e-05	FSD1	55.675	13.871	9.5	5	6	5	0.751	0.788	0.761	1.333	1.332	1.45
A0A287BIV6	Mitochondrial ribosomal protein L37 OS=Sus scrofa OX=9823 GN=MRPL37	0.767	Down	0.0116552	MRPL37	47.855	7.3701	10.4	3	3	3	1.026	0.977	0.896	1.377	1.204	1.2
A0A287BJ88	Transcription factor BTF3 OS=Sus scrofa OX=9823 GN=BTF3	1.239	Up	0.0109794	BTF3	17.699	1.7726	9.9	3	9	1	0.986	1.068	1.029	0.851	0.875	0.762
A0A287BJB2	Serine/threonine-protein kinase VRK1 OS=Sus scrofa OX=9823 GN=VRK1	1.618	Up	0.0041004	VRK1	44.972	18.627	18.2	7	9	7	1.139	1.073	1.209	0.664	0.638	0.812
A0A287BJN7	Huntingtin interacting protein K OS=Sus scrofa OX=9823 GN=HYPK	1.406	Up	0.0174598	HYPK	13.651	14.263	14	1	2	1	1.401	1.166	1.089	0.897	0.908	0.796
A0A287BK29	Chromosome 6 open reading frame 203 OS=Sus scrofa OX=9823 GN=C6orf203	1.299	Up	0.0086809	C6orf203	27.579	1.5413	3.8	1	1	1	1.199	1.04	1.029	0.807	0.872	0.837
A0A287BK58	Galectin OS=Sus scrofa OX=9823 GN=LGALS8	0.826	Down	0.021415	LGALS8	34.142	37.019	20.1	6	8	6	0.947	0.898	0.921	1.142	1.195	1.013
A0A287BK75	Dual specificity mitogen-activated protein kinase kinase 1 OS=Sus scrofa OX=9823 GN=MAP2K1	1.443	Up	0.0065043	MAP2K1	43.439	31.872	19.1	8	12	4	1.036	1.187	1.18	0.704	0.809	0.845
A0A287BK98	PDS5 cohesin associated factor A OS=Sus scrofa OX=9823 GN=PDS5A	0.586	Down	0.00028292	PDS5A	129.42	1.5504	0.8	1	1	1	0.718	0.773	0.796	1.384	1.24	1.278
A0A287BKD9	Heterogeneous nuclear ribonucleoprotein A2/B1 OS=Sus scrofa OX=9823 GN=HNRNPA2B1	0.666	Down	0.0035837	HNRNPA2B1	35.958	138.4	44.1	12	20	12	0.974	0.903	0.778	1.308	1.32	1.359
A0A287BKE7	Transcription elongation factor SPT5 OS=Sus scrofa OX=9823 GN=SUPT5H	2.005	Up	0.022283	SUPT5H	114.51	6.2844	3.5	3	3	3	1.796	1.025	1.106	0.722	0.636	0.601
A0A287BKX5	Solute carrier family 39 member 10 OS=Sus scrofa OX=9823 GN=SLC39A10	0.691	Down	0.0151966	SLC39A10	88.567	3.6203	2.4	2	3	2	0.706	0.874	0.923	1.205	1.121	1.297
A0A287BKY1	MAP kinase-interacting serine/threonine-protein kinase 1 OS=Sus scrofa OX=9823 GN=MKNK1	1.454	Up	0.02186	MKNK1	42.467	6.4183	6.3	2	2	2	1.312	0.944	1.101	0.723	0.779	0.807
A0A287BL76	Nucleoporin 37 OS=Sus scrofa OX=9823 GN=NUP37	1.886	Up	0.0170185	NUP37	36.719	15.886	15.3	6	7	6	0.932	1.196	1.189	0.599	0.576	0.584
A0A287BLB5	PEST proteolytic signal containing nuclear protein OS=Sus scrofa OX=9823 GN=PCNP	1.744	Up	0.0176838	PCNP	18.963	21.632	24.7	3	3	3	1.103	1.001	1.261	0.757	0.681	0.492
A0A287BLM8	Tetratricopeptide repeat domain 4 OS=Sus scrofa OX=9823 GN=TTC4	0.808	Down	0.003564	TTC4	44.433	69.486	18.6	7	9	7	0.869	0.954	0.953	1.18	1.139	1.117
A0A287BLS6	"A-kinase anchor protein 1, mitochondrial OS=Sus scrofa OX=9823 GN=AKAP1"	0.692	Down	0.00142096	AKAP1	92.677	85.491	19.4	14	19	14	0.775	0.85	0.85	1.152	1.146	1.277
A0A287BLV8	Peptidylprolyl isomerase OS=Sus scrofa OX=9823 GN=FKBP8	0.702	Down	0.00022036	FKBP8	44.632	79.745	24.4	9	13	9	0.915	0.86	0.874	1.288	1.207	1.281
A0A287BM02	Histone PARylation factor 1 OS=Sus scrofa OX=9823 GN=HPF1	1.686	Up	0.000180969	HPF1	39.376	48.566	23.1	8	12	8	1.144	1.087	1.052	0.619	0.641	0.687
A0A287BM79	Cold shock domain containing E1 OS=Sus scrofa OX=9823 GN=CSDE1	0.759	Down	0.0057229	CSDE1	93.708	61.519	21.4	18	22	18	0.789	0.928	0.892	1.183	1.138	1.118
A0A287BM93	Uncharacterized protein OS=Sus scrofa OX=9823 GN=RNF113A	1.336	Up	0.00097693	RNF113A	38.181	5.41	7.4	3	3	3	1.074	1.138	1.086	0.797	0.87	0.801
A0A287BM97	Uncharacterized protein OS=Sus scrofa OX=9823 GN=NUDT15	1.262	Up	0.0068211	NUDT15	19.083	5.3611	5.3	2	3	2	1.183	1.032	1.077	0.862	0.843	0.903
A0A287BMA3	DDB1- and CUL4-associated factor 8 OS=Sus scrofa OX=9823 GN=DCAF8	0.713	Down	0.00169886	DCAF8	55.547	33.977	21.6	10	18	9	0.901	0.824	0.837	1.116	1.218	1.257
A0A287BN19	Dishevelled associated activator of morphogenesis 1 OS=Sus scrofa OX=9823 GN=DAAM1	0.734	Down	0.033121	DAAM1	122.22	26.109	8.3	9	9	9	0.727	0.872	1.005	1.109	1.201	1.239
A0A287BN74	Tumor protein p63 OS=Sus scrofa OX=9823 GN=TP63	0.751	Down	0.041715	TP63	71.336	9.6488	5.8	4	5	4	0.772	0.916	0.913	1.112	1.022	1.329
A0A287BND4	Translocase of outer mitochondrial membrane 70 OS=Sus scrofa OX=9823 GN=TOMM70	0.624	Down	5.78e-05	TOMM70	58.486	120.83	30.5	18	33	18	0.775	0.817	0.844	1.309	1.314	1.28
A0A287BNF3	Phospholipase A2 activating protein OS=Sus scrofa OX=9823 GN=PLAA	1.284	Up	0.0028007	PLAA	84.945	30.191	15.2	11	12	11	1.147	1.161	1.111	0.918	0.825	0.92
A0A287BNN0	Coiled-coil domain containing 88A OS=Sus scrofa OX=9823 GN=CCDC88A	0.774	Down	0.00049687	CCDC88A	209.8	72.731	11.2	20	26	20	0.874	0.94	0.918	1.154	1.171	1.204
A0A287BNN3	"SWT1, RNA endoribonuclease homolog OS=Sus scrofa OX=9823 GN=SWT1"	2.779	Up	0.00166252	SWT1	92.646	3.8258	3.6	3	3	3	1.023	1.298	1.206	0.409	0.344	0.516
A0A287BNQ9	Kinesin-like protein OS=Sus scrofa OX=9823 GN=KIF23	1.454	Up	0.00033513	KIF23	88.645	54.834	11.5	8	9	8	1.102	1.191	1.128	0.819	0.777	0.757
A0A287BNT2	Junctional adhesion molecule 2 OS=Sus scrofa OX=9823 GN=JAM2	0.604	Down	0.036785	JAM2	31.19	3.304	4.3	1	1	1	0.999	0.877	0.719	1.645	1.559	1.089
A0A287BNZ2	POC5 centriolar protein OS=Sus scrofa OX=9823 GN=POC5	3.183	Up	0.0046246	POC5	53.901	9.383	6.7	3	4	3	1.351	1.321	1.358	0.488	0.374	0.404
A0A287BP09	BUB1 mitotic checkpoint serine/threonine kinase B OS=Sus scrofa OX=9823 GN=BUB1B	1.657	Up	0.00066009	BUB1B	116.62	189.14	19.5	17	28	17	1.191	1.14	1.103	0.627	0.715	0.731
A0A287BP76	Nucleoporin 153 OS=Sus scrofa OX=9823 GN=NUP153	1.425	Up	0.020835	NUP153	148.17	31.046	5.6	6	7	6	1.124	1.199	1.008	0.751	0.682	0.904
A0A287BPT1	TM2 domain containing 3 OS=Sus scrofa OX=9823 GN=TM2D3	1.297	Up	0.038705	TM2D3	24.539	3.1535	4.1	1	2	1	0.937	1.212	1.159	0.893	0.813	0.845
A0A287BQI0	Beta-catenin-like protein 1 OS=Sus scrofa OX=9823 GN=CTNNBL1	2.215	Up	0.031765	CTNNBL1	65.232	1.8284	3.2	2	2	2	1.108	0.894	0.975	0.524	0.566	0.254
A0A287BQQ3	Adducin 3 OS=Sus scrofa OX=9823 GN=ADD3	2.237	Up	0.00125679	ADD3	75.436	4.1462	3	2	2	2	1.466	1.186	1.075	0.521	0.59	0.555
A0A287BR18	Large 60S subunit nuclear export GTPase 1 OS=Sus scrofa OX=9823 GN=LSG1	0.566	Down	0.0046399	LSG1	72.653	2.5272	2.8	2	2	2	0.772	0.716	0.835	1.177	1.594	1.333
A0A287BR88	SIN3 transcription regulator family member A OS=Sus scrofa OX=9823 GN=SIN3A	1.869	Up	0.00124128	SIN3A	131.29	56.732	11	12	17	12	1.24	1.086	1.061	0.627	0.65	0.535
A0A287BR93	Structural maintenance of chromosomes protein OS=Sus scrofa OX=9823 GN=SMC1B	1.667	Up	0.00050166	SMC1B	145.05	3.4143	1.4	2	2	2	1.168	1.047	1.208	0.718	0.666	0.669
A0A287BR95	"RAB25, member RAS oncogene family OS=Sus scrofa OX=9823 GN=RAB25"	2.008	Up	0.00039566	RAB25	23.566	-2	4.7	1	2	1	1.145	1.259	1.147	0.604	0.528	0.636
A0A287BRL8	Myristoylated alanine rich protein kinase C substrate OS=Sus scrofa OX=9823 GN=MARCKS	0.455	Down	1.61e-06	MARCKS	31.583	45.46	21.1	6	13	6	0.703	0.68	0.716	1.576	1.496	1.538
A0A287BRM0	Discs large MAGUK scaffold protein 5 OS=Sus scrofa OX=9823 GN=DLG5	1.622	Up	0.0021204	DLG5	209.16	1.651	0.4	1	1	1	1.135	1.155	1.027	0.668	0.62	0.757
A0A287BRR9	BAI1 associated protein 2 OS=Sus scrofa OX=9823 GN=BAIAP2	1.589	Up	0.000124604	BAIAP2	57.301	88.687	32.6	16	22	16	1.172	1.208	1.112	0.735	0.757	0.705
A0A287BRU6	Tyrosine-protein kinase OS=Sus scrofa OX=9823 GN=CSK	0.806	Down	0.0199554	CSK	50.572	6.0581	6.2	3	3	3	0.833	0.943	0.911	1.161	1.016	1.157
A0A287BRX4	Syntaxin 8 OS=Sus scrofa OX=9823 GN=STX8	0.731	Down	0.017723	STX8	26.803	4.818	6.4	1	2	1	0.82	0.696	0.868	1.083	1.001	1.178
A0A287BS35	Cytidine monophosphate N-acetylneuraminic acid synthetase OS=Sus scrofa OX=9823 GN=CMAS	0.626	Down	0.0034557	CMAS	60.467	1.7313	1.8	1	1	1	0.915	0.728	0.745	1.294	1.213	1.31
A0A287BS59	Oxidation resistance 1 OS=Sus scrofa OX=9823 GN=OXR1	0.677	Down	0.00136413	OXR1	90.554	23.858	10.8	8	11	8	0.854	0.915	0.913	1.328	1.218	1.415
A0A287BS73	Neurobeachin like 2 OS=Sus scrofa OX=9823 GN=NBEAL2	3.466	Up	0.0050219	NBEAL2	252.37	4.1824	1.1	2	2	2	1.694	0.933	1.771	0.436	0.46	0.373
A0A287BSJ6	Uncharacterized protein OS=Sus scrofa OX=9823 GN=LOC100511376	1.321	Up	0.00021819	LOC100511376	349.68	60.876	10.3	29	31	28	1.046	1.024	1.095	0.787	0.812	0.797
A0A287BSQ4	Ladinin 1 OS=Sus scrofa OX=9823 GN=LAD1	0.711	Down	0.00077731	LAD1	54.561	205.63	36.8	17	35	17	0.851	0.896	0.801	1.215	1.152	1.219
A0A287BT13	Non-specific serine/threonine protein kinase OS=Sus scrofa OX=9823 GN=MARK3	0.683	Down	0.0027037	MARK3	81.38	10.022	10.4	6	6	4	0.749	0.902	0.799	1.149	1.211	1.225
A0A287BTA1	Negative elongation factor complex member A OS=Sus scrofa OX=9823 GN=NELFA	2.122	Up	0.0120152	NELFA	56.182	3.1227	2.1	1	1	1	1.158	1.123	1.261	0.389	0.571	0.709
A0A287BTN0	Junctophilin 3 OS=Sus scrofa OX=9823 GN=JPH3	1.322	Up	0.03378	JPH3	77.99	5.9285	6.4	5	7	5	1.302	1.015	1.049	0.867	0.789	0.891
A0A288CFX9	High mobility group protein HMGI-C OS=Sus scrofa OX=9823 GN=LOC100359361	1.858	Up	0.0003027	LOC100359361	11.831	13.76	33.3	5	5	5	1.08	1.066	0.974	0.546	0.527	0.606
A0A288CFY3	Tropomyosin alpha-3 chain OS=Sus scrofa OX=9823 GN=TPM3	0.184	Down	0.00093588	TPM3	28.922	51.22	37.1	11	18	2	0.355	0.416	0.413	2.158	2.132	2.151
A0SEH3	Complement component C8 gamma chain precursor OS=Sus scrofa OX=9823 GN=C8G	1.359	Up	0.044805	C8G	22.283	16.232	27.7	4	5	4	1.067	0.768	0.874	0.692	0.612	0.689
A2TEQ2	Nectin-2 precursor OS=Sus scrofa OX=9823 GN=prr2	0.602	Down	0.0056835	prr2	51.525	5.346	4.6	2	3	2	0.705	0.908	0.698	1.312	1.346	1.18
A4PES0	Wee1-like protein kinase 2 OS=Sus scrofa OX=9823 GN=WEE2	4.027	Up	2.41e-05	WEE2	62.927	137.78	31.7	17	33	17	1.512	1.381	1.259	0.323	0.368	0.34
A4U9C9	AN1-type zinc finger protein 5 OS=Sus scrofa OX=9823 GN=ZFAND5	1.479	Up	0.00085728	ZFAND5	23.102	1.8028	8.5	2	3	2	1.264	1.119	1.126	0.765	0.793	0.814
A5GFN6	mRNA export factor OS=Sus scrofa OX=9823 GN=RAE1	1.223	Up	0.0117447	RAE1	41.025	105.06	34.8	10	17	10	1.083	1.151	1.039	0.906	0.937	0.833
A6N8P5	Endothelial differentiation related factor 1 OS=Sus scrofa OX=9823 GN=MBF1	0.798	Down	0.00047892	MBF1	16.396	12.934	39.2	7	8	7	0.849	0.907	0.891	1.095	1.125	1.096
B0LY42	Basigin precursor OS=Sus scrofa OX=9823 GN=BSG	0.653	Down	0.0002023	BSG	29.421	16.783	26.8	7	8	7	0.922	0.87	0.846	1.4	1.303	1.337
B0M1M6	DNA repair protein RAD51 homolog OS=Sus scrofa OX=9823 GN=pigRAD51	1.42	Up	0.0022166	pigRAD51	36.994	56.553	15.9	5	7	5	1.158	1.141	1.004	0.743	0.794	0.789
B1PXG0	LIN28 OS=Sus scrofa OX=9823 GN=LIN28	1.647	Up	0.041304	LIN28	22.382	21.796	24.9	4	4	4	1.37	1.11	0.918	0.866	0.592	0.605
B2ZI35	F11 receptor OS=Sus scrofa OX=9823 GN=F11R	3.293	Up	1.56e-05	F11R	32.287	8.4203	14.4	4	4	4	1.45	1.288	1.444	0.439	0.423	0.408
B5APU3	Actin-related protein 2-like protein OS=Sus scrofa OX=9823 GN=ACTR2	1.24	Up	0.0107952	ACTR2	44.76	69.578	26.6	8	19	8	1.134	1.17	1.029	0.919	0.922	0.847
B5APU6	Actin-related protein 2/3 complex subunit OS=Sus scrofa OX=9823 GN=ARPC1B	0.822	Down	0.0097848	ARPC1B	40.974	46.294	21.2	7	7	7	0.833	0.959	0.917	1.119	1.085	1.091
B7U6F1	MAP kinase-activated protein kinase 5 OS=Sus scrofa OX=9823 GN=MAPKAPK5	0.612	Down	1.57e-05	MAPKAPK5	54.025	1.7347	1.7	1	1	1	0.776	0.802	0.823	1.326	1.304	1.296
B7U6F4	Serine/threonine protein kinase MST4 OS=Sus scrofa OX=9823 GN=STK26	0.707	Down	0.00026105	STK26	46.556	8.1496	16.6	6	9	2	0.861	0.861	0.924	1.215	1.242	1.284
B9TRX0	Leptin receptor gene-related protein OS=Sus scrofa OX=9823 GN=LEPROT	3.066	Up	0.0108616	LEPROT	14.198	1.7223	9.9	1	1	1	1.624	1.155	1.173	0.258	0.489	0.542
C0LZL0	Fascin OS=Sus scrofa OX=9823 GN=FSCN1	0.474	Down	1.72e-05	FSCN1	54.683	48.831	20.7	9	11	9	0.739	0.69	0.744	1.569	1.48	1.535
D2D0D8	Acetyl-CoA carboxylase 1 OS=Sus scrofa OX=9823 GN=ACACA	0.748	Down	0.0034767	ACACA	265.34	20.468	3.3	7	8	7	0.879	0.901	0.937	1.144	1.314	1.172
D2IE28	Cyclin B1 transcript variant 1 OS=Sus scrofa OX=9823 GN=CCNB1	1.94	Up	0.00024373	CCNB1	48.662	7.9922	9	4	6	4	1.067	1.134	1.206	0.61	0.539	0.607
D3K5N3	Midkine precursor OS=Sus scrofa OX=9823 GN=MDK	1.693	Up	0.0188414	MDK	15.597	9.4323	23.8	3	3	3	0.853	0.794	0.645	0.459	0.532	0.363
D7RA17	WD repeat domain phosphoinositide-interacting protein 3 OS=Sus scrofa OX=9823 GN=WDR45B	1.502	Up	0.00326	WDR45B	38.107	1.6594	2.3	1	2	1	1.092	1.047	1.181	0.72	0.814	0.676
E7CR04	Suppressor of cytokine signaling 1 OS=Sus scrofa OX=9823 GN=socs1	0.667	Down	0.002339	socs1	24.374	1.5372	8.6	1	1	1	0.912	0.848	0.782	1.364	1.194	1.255
F1RF36	Adhesion G-protein coupled receptor G1 precursor OS=Sus scrofa OX=9823 GN=ADGRG1	0.649	Down	0.00036232	ADGRG1	77.308	20.048	5.7	3	4	3	0.848	0.782	0.881	1.249	1.319	1.299
F1RF51	Ribonuclease K OS=Sus scrofa OX=9823 GN=RNASEK	0.451	Down	0.00066289	RNASEK	11.007	2.318	11.2	1	3	1	0.61	0.796	0.704	1.494	1.662	1.521
F1RFI0	SH2B adaptor protein 1 OS=Sus scrofa OX=9823 GN=SH2B1	1.225	Up	0.020939	SH2B1	76.167	3.0053	2.5	2	3	2	1.031	1.147	1.078	0.951	0.895	0.813
F1RFK7	BAI1 associated protein 2 like 1 OS=Sus scrofa OX=9823 GN=BAIAP2L1	0.702	Down	0.00064023	BAIAP2L1	56.238	38.305	26.1	13	17	13	0.803	0.868	0.906	1.202	1.224	1.244
F1RFT3	"Proline, glutamate and leucine rich protein 1 OS=Sus scrofa OX=9823 GN=PELP1"	0.61	Down	0.0074172	PELP1	116.79	9.812	4.6	4	5	4	0.632	0.76	0.776	1.077	1.362	1.113
F1RG40	Nucleoporin 133 OS=Sus scrofa OX=9823 GN=NUP133	1.657	Up	0.00025873	NUP133	110.26	16.953	8.5	8	12	8	1.078	1.156	1.229	0.702	0.675	0.713
F1RG63	Uncharacterized protein OS=Sus scrofa OX=9823 GN=DCTPP1	1.234	Up	0.00157949	DCTPP1	18.498	28.302	34.5	5	8	5	1.079	1.081	1.059	0.916	0.854	0.839
F1RG67	CD2 cytoplasmic tail binding protein 2 OS=Sus scrofa OX=9823 GN=CD2BP2	0.808	Down	0.0146835	CD2BP2	37.424	1.458	3.2	1	1	1	0.917	0.876	0.936	1.116	1.038	1.223
F1RGA9	Coronin OS=Sus scrofa OX=9823 GN=CORO1C	0.783	Down	0.027078	CORO1C	53.234	44.62	24.5	15	31	15	0.756	0.902	0.954	1.094	1.084	1.157
F1RGD1	Bet1 golgi vesicular membrane trafficking protein like OS=Sus scrofa OX=9823 GN=BET1L	0.496	Down	0.00042182	BET1L	12.39	24.607	32.4	3	4	3	0.695	0.673	0.823	1.483	1.417	1.516
F1RGE3	NADH dehydrogenase [ubiquinone] 1 alpha subcomplex subunit 2 OS=Sus scrofa OX=9823 GN=NDUFA2	0.774	Down	0.0037164	NDUFA2	11.082	38.438	49.5	5	9	5	0.833	0.934	0.923	1.161	1.114	1.201
F1RGF2	Uncharacterized protein OS=Sus scrofa OX=9823 GN=CYSTM1	0.808	Down	0.0125229	CYSTM1	11.152	3.4409	9.7	1	1	1	0.93	0.971	0.837	1.172	1.136	1.082
F1RGP0	Gamma-glutamyltransferase 6 OS=Sus scrofa OX=9823 GN=GGT6	0.806	Down	0.0069175	GGT6	56.037	1.6871	1.5	1	2	1	0.88	0.954	0.849	1.087	1.078	1.165
F1RGU8	"Nucleoside-triphosphatase, cancer-related OS=Sus scrofa OX=9823 GN=NTPCR"	0.519	Down	0.00043985	NTPCR	20.33	23.679	18	3	3	3	0.828	0.743	0.681	1.519	1.399	1.423
F1RH90	Kinesin-like protein OS=Sus scrofa OX=9823 GN=KIF20A	2.563	Up	9.76e-05	KIF20A	100.26	144.04	24.6	18	23	18	1.255	1.289	1.352	0.504	0.557	0.459
F1RHZ8	PIH1 domain-containing protein 1 OS=Sus scrofa OX=9823 GN=PIH1D1	0.816	Down	0.043398	PIH1D1	32.265	27.394	24.5	7	7	7	0.777	0.966	0.94	1.126	1.103	1.057
F1RI52	Rap associating with DIL domain OS=Sus scrofa OX=9823 GN=RADIL	2.435	Up	1.61e-05	RADIL	115.6	8.1295	3	3	4	3	1.357	1.235	1.268	0.545	0.529	0.511
F1RI72	Golgin A3 OS=Sus scrofa OX=9823 GN=GOLGA3	0.825	Down	0.00052111	GOLGA3	166.67	135.68	14.4	21	23	21	0.914	0.967	0.958	1.149	1.161	1.132
F1RI92	Cytoplasmic polyadenylation element-binding protein 1 OS=Sus scrofa OX=9823 GN=CPEB1	0.14	Down	0.000141669	CPEB1	62.092	52.272	21.2	9	15	9	0.321	0.363	0.232	2.365	2.059	2.134
F1RIA7	Transmembrane protein 109 OS=Sus scrofa OX=9823 GN=TMEM109	1.801	Up	0.000181025	TMEM109	26.11	7.8537	9.1	3	5	3	1.229	1.194	1.094	0.686	0.637	0.63
F1RIW7	Zinc finger AN1-type containing 2A OS=Sus scrofa OX=9823 GN=ZFAND2A	4.473	Up	0.0022842	ZFAND2A	15.986	38.271	40.3	6	10	6	1.155	1.309	1.329	0.198	0.411	0.239
F1RJ04	Centrosomal protein 44 OS=Sus scrofa OX=9823 GN=CEP44	2.323	Up	5.56e-05	CEP44	40.618	4.1931	5	2	3	2	1.097	1.26	1.222	0.498	0.513	0.53
F1RJC5	Uncharacterized protein OS=Sus scrofa OX=9823 GN=CDK11B	1.543	Up	0.00050164	CDK11B	90.79	7.1346	3.5	3	3	3	1.145	1.091	1.206	0.711	0.731	0.788
F1RJJ2	Uncharacterized protein OS=Sus scrofa OX=9823 GN=TYW1	1.46	Up	3.55e-05	TYW1	76.086	9.8994	6.7	4	6	4	1.045	1.073	1.039	0.742	0.716	0.705
F1RJJ3	Ribosome maturation protein SBDS OS=Sus scrofa OX=9823 GN=SBDS	1.259	Up	0.00107721	SBDS	28.745	13.979	23.6	7	9	7	1.022	1.077	1.07	0.839	0.871	0.808
F1RJM4	TRAF-type zinc finger domain containing 1 OS=Sus scrofa OX=9823 GN=TRAFD1	2.45	Up	2.05e-05	TRAFD1	65.133	42.026	12.7	6	8	6	1.373	1.228	1.224	0.511	0.524	0.526
F1RJR9	Lymphokine-activated killer T-cell-originated protein kinase OS=Sus scrofa OX=9823 GN=PBK	1.391	Up	0.0080406	PBK	36.187	15.539	15.5	5	8	5	0.925	1.132	1.058	0.793	0.725	0.722
F1RK02	Lymphocyte cytosolic protein 1 OS=Sus scrofa OX=9823 GN=LCP1	0.611	Down	0.0031633	LCP1	70.203	-2	10.8	7	12	1	0.726	0.864	0.902	1.421	1.406	1.25
F1RK15	RCC1 and BTB domain containing protein 2 OS=Sus scrofa OX=9823 GN=RCBTB2	1.203	Up	0.041703	RCBTB2	57.536	8.6164	3.6	2	2	2	0.9	1.067	1.088	0.866	0.832	0.841
F1RK78	Ess-2 splicing factor homolog OS=Sus scrofa OX=9823 GN=ESS2	1.423	Up	0.00133591	ESS2	52.593	15.06	7.1	3	3	3	1.187	1.045	1.063	0.744	0.789	0.783
F1RKE4	RNA polymerase II subunit J OS=Sus scrofa OX=9823 GN=POLR2J	1.634	Up	0.00180029	POLR2J	13.293	6.1771	17.1	2	4	2	1.039	1.15	1.124	0.664	0.612	0.751
F1RKJ3	Uncharacterized protein OS=Sus scrofa OX=9823 GN=C6H19orf33	0.817	Down	0.0163635	C6H19orf33	10.958	7.6309	17.5	2	2	2	0.808	0.934	0.915	1.069	1.049	1.136
F1RKJ9	Isochorismatase domain containing 1 OS=Sus scrofa OX=9823 GN=ISOC1	1.236	Up	0.036356	ISOC1	32.104	72.085	16.8	4	9	4	1.243	1.023	1.09	0.969	0.859	0.888
F1RKM0	Lamin B1 OS=Sus scrofa OX=9823 GN=LMNB1	1.464	Up	0.0030827	LMNB1	66.485	14.022	12.6	7	7	7	1.212	1.095	1.065	0.823	0.705	0.775
F1RKQ9	"Succinate dehydrogenase assembly factor 2, mitochondrial OS=Sus scrofa OX=9823 GN=SDHAF2"	0.52	Down	7.76e-05	SDHAF2	19.57	4.7763	12	3	3	3	0.735	0.811	0.763	1.543	1.408	1.489
F1RKS3	Flap endonuclease 1 OS=Sus scrofa OX=9823 GN=FEN1	1.371	Up	0.026478	FEN1	42.402	9.8943	8.9	3	4	3	0.94	1.04	1.111	0.648	0.853	0.753
F1RKU1	Acyl-CoA synthetase bubblegum family member 1 OS=Sus scrofa OX=9823 GN=ACSBG1	0.667	Down	0.035963	ACSBG1	78.521	2.8343	2.4	2	2	2	1.045	0.689	0.876	1.38	1.374	1.158
F1RKX9	"CRK like proto-oncogene, adaptor protein OS=Sus scrofa OX=9823 GN=CRKL"	1.214	Up	0.022316	CRKL	33.796	21.855	25.4	6	10	6	1.176	1.054	1.056	0.834	0.923	0.95
F1RL66	Treacle ribosome biogenesis factor 1 OS=Sus scrofa OX=9823 GN=TCOF1	0.672	Down	0.00056204	TCOF1	138.3	4.8217	2.2	3	3	3	0.844	0.819	0.853	1.299	1.156	1.29
F1RLL1	Rho guanine nucleotide exchange factor 7 OS=Sus scrofa OX=9823 GN=ARHGEF7	0.443	Down	0.000141982	ARHGEF7	73.008	17.142	9.1	5	5	5	0.652	0.749	0.633	1.597	1.464	1.532
F1RLS1	Uncharacterized protein OS=Sus scrofa OX=9823 GN=SPECC1L	1.206	Up	0.0153603	SPECC1L	121.35	126.35	15	14	19	13	0.955	1.02	1.112	0.863	0.864	0.833
F1RLV6	Eukaryotic translation initiation factor 4E nuclear import factor 1 OS=Sus scrofa OX=9823 GN=EIF4ENIF1	0.643	Down	0.0017798	EIF4ENIF1	108.25	322.7	23.7	23	38	23	0.745	0.903	0.866	1.304	1.336	1.271
F1RM08	Amino acid transporter OS=Sus scrofa OX=9823 GN=SLC1A5	2.566	Up	0.000124067	SLC1A5	56.448	3.7684	3	2	2	2	1.145	1.216	1.188	0.519	0.441	0.423
F1RM10	Transcription elongation regulator 1 OS=Sus scrofa OX=9823 GN=TCERG1	1.45	Up	0.045096	TCERG1	121.05	4.6974	3.9	4	5	3	1.282	1.094	1.272	0.922	0.947	0.647
F1RM78	Lipolysis stimulated lipoprotein receptor OS=Sus scrofa OX=9823 GN=LSR	1.531	Up	0.0154385	LSR	66.103	6.5863	4.2	2	2	2	1.136	1.306	0.973	0.824	0.669	0.738
F1RMA7	Uncharacterized protein OS=Sus scrofa OX=9823 GN=PDLIM2	0.364	Down	0.00033988	PDLIM2	37.925	65.544	26.3	7	8	7	0.555	0.604	0.7	1.576	1.902	1.634
F1RMD2	Cytoskeleton associated protein 2 OS=Sus scrofa OX=9823 GN=CKAP2	2.201	Up	0.0041039	CKAP2	68.077	10.369	8.4	5	5	5	1.043	1.161	1.452	0.644	0.47	0.547
F1RMM1	Family with sequence similarity 160 member A2 OS=Sus scrofa OX=9823 GN=FAM160A2	1.253	Up	0.026736	FAM160A2	89.909	1.8714	1.1	1	1	1	1.281	1.09	1.042	0.934	0.881	0.908
F1RMU2	TATA-box binding protein associated factor 7 OS=Sus scrofa OX=9823 GN=TAF7	0.655	Down	0.0035202	TAF7	40.245	3.3572	6	2	3	2	0.856	0.701	0.806	1.179	1.142	1.286
F1RMW4	X-ray repair cross complementing 1 OS=Sus scrofa OX=9823 GN=XRCC1	0.594	Down	0.020879	XRCC1	59.262	14.015	11.4	6	7	6	0.877	0.599	0.927	1.274	1.294	1.48
F1RMX2	PRA1 family protein OS=Sus scrofa OX=9823 GN=RABAC1	0.74	Down	0.00117836	RABAC1	20.666	-2	4.9	1	1	1	0.844	0.825	0.887	1.169	1.087	1.2
F1RN04	Uncharacterized protein OS=Sus scrofa OX=9823	0.812	Down	0.0027387	---	39.84	-2	2.3	1	1	1	0.83	0.86	0.916	1.076	1.043	1.09
F1RN05	Serine palmitoyltransferase long chain base subunit 1 OS=Sus scrofa OX=9823 GN=SPTLC1	2.022	Up	0.00095945	SPTLC1	52.642	5.595	3.6	3	3	3	1.487	1.14	1.322	0.68	0.629	0.644
F1RN68	Carboxypeptidase D OS=Sus scrofa OX=9823 GN=CPD	0.802	Down	0.0087599	CPD	152.18	16.629	5.5	8	11	8	0.997	0.885	0.97	1.132	1.174	1.25
F1RN76	CD5 antigen-like precursor OS=Sus scrofa OX=9823 GN=CD5L	0.613	Down	0.00041853	CD5L	59.563	70.087	25	9	15	9	0.873	0.822	0.815	1.4	1.436	1.261
F1RN89	"NUFIP2, FMR1 interacting protein 2 OS=Sus scrofa OX=9823 GN=NUFIP2"	1.367	Up	0.00159736	NUFIP2	68.39	11.556	7.3	4	4	4	1.077	0.977	1.098	0.778	0.74	0.788
F1RNN0	Vacuolar protein sorting-associated protein 29 OS=Sus scrofa OX=9823 GN=VPS29	0.82	Down	0.00107723	VPS29	20.492	43.628	36.8	7	11	7	0.884	0.943	0.887	1.115	1.115	1.08
F1RP25	Citrate lyase beta like OS=Sus scrofa OX=9823 GN=CLYBL	1.282	Up	0.0078416	CLYBL	37.493	5.8854	8.8	3	3	3	1.154	1.109	1.202	0.837	0.977	0.888
F1RP28	UBA domain containing 2 OS=Sus scrofa OX=9823 GN=UBAC2	1.544	Up	0.010917	UBAC2	37.244	5.4994	6.4	2	2	2	1.44	1.089	1.105	0.782	0.824	0.747
F1RPP2	Uncharacterized protein OS=Sus scrofa OX=9823 GN=SKA1	1.687	Up	0.0125002	SKA1	29.365	13.654	19.6	5	7	5	0.841	1.219	1.159	0.658	0.61	0.64
F1RPQ8	Myosin VB OS=Sus scrofa OX=9823 GN=MYO5B	0.809	Down	0.00041589	MYO5B	210.08	237.78	24.1	45	67	38	0.884	0.931	0.91	1.151	1.107	1.11
F1RPU6	Myelin protein zero like 1 OS=Sus scrofa OX=9823 GN=MPZL1	0.663	Down	0.0192425	MPZL1	29.241	4.1739	7.1	2	2	2	0.768	0.786	1.067	1.31	1.245	1.398
F1RQ90	"RNA-binding motif protein, X chromosome OS=Sus scrofa OX=9823 GN=RBMX"	0.748	Down	0.00022194	RBMX	42.274	30.114	19.2	8	10	6	0.913	0.89	0.955	1.208	1.228	1.251
F1RQH3	Formin like 2 OS=Sus scrofa OX=9823 GN=FMNL2	2.216	Up	0.0066989	FMNL2	116.4	14.49	7.6	8	8	6	1.761	1.1	1.217	0.565	0.61	0.665
F1RQN0	Adenosine deaminase domain containing 1 OS=Sus scrofa OX=9823 GN=ADAD1	0.687	Down	0.01894	ADAD1	67.175	6.9166	6.1	3	4	3	1.037	0.758	0.853	1.362	1.307	1.185
F1RQN5	Spermatogenesis-associated protein 5 OS=Sus scrofa OX=9823 GN=SPATA5	1.501	Up	4.34e-05	SPATA5	83.731	220.32	28.6	22	34	21	1.176	1.146	1.107	0.748	0.756	0.78
F1RQW2	Complement C4-A precursor OS=Sus scrofa OX=9823 GN=C4A	1.436	Up	0.0142446	C4A	192.43	17.44	4.9	8	10	8	0.707	0.896	0.813	0.606	0.506	0.57
F1RR55	Securin OS=Sus scrofa OX=9823 GN=PTTG1	4.108	Up	0.012159	PTTG1	22.165	9.1327	16.8	3	4	3	1.331	1.332	1.289	0.303	0.418	0.241
F1RR69	Protein SET OS=Sus scrofa OX=9823 GN=SET	0.694	Down	0.0102849	SET	29.991	15.725	13.6	4	6	4	0.738	0.896	0.954	1.274	1.182	1.275
F1RRG9	"SWI/SNF related, matrix associated, actin dependent regulator of chromatin, subfamily a, member 5 OS=Sus scrofa OX=9823 GN=SMARCA5"	1.645	Up	0.00127825	SMARCA5	121.99	20.209	9.2	10	10	10	0.99	1.169	1.054	0.63	0.622	0.701
F1RS44	N-glycanase 1 OS=Sus scrofa OX=9823 GN=NGLY1	2.433	Up	1.76e-05	NGLY1	74.485	122.4	23.7	15	24	15	1.133	1.233	1.233	0.492	0.475	0.512
F1RS85	Methyltransferase-like protein OS=Sus scrofa OX=9823 GN=METTL6	2.136	Up	6.25e-05	METTL6	33.256	9.2052	14.4	5	5	5	1.224	1.168	1.058	0.547	0.534	0.534
F1RSR1	Spartin OS=Sus scrofa OX=9823 GN=SPART	0.816	Down	0.0006004	SPART	65.154	55.315	14.8	9	11	9	0.924	0.974	0.922	1.175	1.134	1.148
F1RSY9	Cell division cycle 40 OS=Sus scrofa OX=9823 GN=CDC40	1.926	Up	0.0088436	CDC40	65.43	2.0129	2.1	1	1	1	1.372	0.962	1.404	0.63	0.592	0.719
F1RT10	CDKN2A interacting protein OS=Sus scrofa OX=9823 GN=CDKN2AIP	1.684	Up	0.0132974	CDKN2AIP	61.508	15.471	10.1	4	4	4	1.07	1.35	0.972	0.725	0.577	0.712
F1RT18	Nei like DNA glycosylase 3 OS=Sus scrofa OX=9823 GN=NEIL3	4.915	Up	0.00089536	NEIL3	66.364	8.182	7	4	4	4	1.774	1.289	1.149	0.305	0.331	0.221
F1RTF0	Protein PRRC2A OS=Sus scrofa OX=9823 GN=PRRC2A	0.767	Down	0.0082233	PRRC2A	229.1	62.69	4.5	8	11	8	0.818	0.953	0.898	1.098	1.156	1.226
F1RU28	DR1 associated protein 1 OS=Sus scrofa OX=9823 GN=DRAP1	1.548	Up	0.00082252	DRAP1	22.314	2.061	3.9	1	1	1	1.234	1.079	1.24	0.758	0.788	0.749
F1RU33	Uncharacterized protein OS=Sus scrofa OX=9823 GN=BANF1	1.302	Up	0.0062954	BANF1	10.044	6.6597	32.6	3	3	3	0.939	1.046	1.098	0.819	0.778	0.771
F1RUD8	"Geminin, DNA replication inhibitor OS=Sus scrofa OX=9823 GN=GMNN"	2.327	Up	7.52e-05	GMNN	23.507	10.63	19.6	4	4	4	1.058	1.117	1.153	0.502	0.491	0.437
F1RUG5	WNK lysine deficient protein kinase 3 OS=Sus scrofa OX=9823 GN=WNK3	0.777	Down	0.0047026	WNK3	191.54	9.9783	4.2	7	8	5	0.962	0.848	0.847	1.173	1.118	1.13
F1RUL1	RNA binding motif protein 17 OS=Sus scrofa OX=9823 GN=RBM17	1.469	Up	0.004302	RBM17	44.931	14.447	13	6	8	6	1.231	1.222	1.039	0.849	0.76	0.768
F1RUP2	G-rich RNA sequence binding factor 1 OS=Sus scrofa OX=9823 GN=GRSF1	0.688	Down	0.0095756	GRSF1	52.984	14.25	7.7	4	4	4	0.893	0.804	0.827	1.175	1.399	1.095
F1RUR8	Par-3 family cell polarity regulator OS=Sus scrofa OX=9823 GN=PARD3	0.577	Down	0.036717	PARD3	129.23	2.8665	1.7	2	2	2	0.58	0.704	1.066	1.296	1.266	1.51
F1RUS8	Tubulin-specific chaperone C OS=Sus scrofa OX=9823 GN=TBCC	3.371	Up	0.0021376	TBCC	39.029	34.347	15	5	6	5	1.703	1.243	1.52	0.386	0.36	0.579
F1RV23	cAMP-dependent protein kinase type I-alpha regulatory subunit OS=Sus scrofa OX=9823 GN=PRKAR1A	1.21	Up	0.0046182	PRKAR1A	40.675	18.806	16.9	6	7	6	1.036	1.021	1.13	0.872	0.866	0.895
F1RV73	Bone morphogenetic protein 15 OS=Sus scrofa OX=9823 GN=BMP15	0.774	Down	0.0033016	BMP15	45.966	27.226	19.2	9	23	9	0.89	0.791	0.806	1.033	1.08	1.099
F1RV94	Uncharacterized protein OS=Sus scrofa OX=9823 GN=LOC100517166	1.302	Up	0.0117163	LOC100517166	11.657	1.599	7	1	1	1	1.206	1.016	1.129	0.902	0.806	0.865
F1RVK2	Microtubule associated serine/threonine kinase like OS=Sus scrofa OX=9823 GN=MASTL	2.132	Up	0.025937	MASTL	96.983	9.1757	5.1	4	8	3	0.914	1.036	1.374	0.508	0.512	0.539
F1RVN1	"NADH dehydrogenase [ubiquinone] flavoprotein 1, mitochondrial OS=Sus scrofa OX=9823 GN=NDUFV1"	0.803	Down	0.0107954	NDUFV1	50.569	23.748	20.5	10	15	10	0.866	0.937	0.906	1.124	1.119	1.132
F1RVS1	Cap methyltransferase 1 OS=Sus scrofa OX=9823 GN=CMTR1	1.3	Up	0.0063824	CMTR1	83.121	23.22	12.2	11	14	11	0.97	1.06	1.106	0.835	0.754	0.823
F1RVX2	Hematological and neurological expressed 1 protein OS=Sus scrofa OX=9823 GN=JPT1	0.657	Down	0.00020138	JPT1	16.07	88.541	45.5	5	8	5	0.836	0.866	0.796	1.306	1.278	1.216
F1RVX6	Nucleoporin 85 OS=Sus scrofa OX=9823 GN=NUP85	1.204	Up	0.022455	NUP85	72.22	44.615	8	4	5	4	0.985	1.09	1.087	0.808	0.908	0.91
F1RWJ9	Ubiquitin-conjugating enzyme E2 W OS=Sus scrofa OX=9823 GN=UBE2W	1.355	Up	0.042116	UBE2W	17.315	3.5098	11.9	1	1	1	1.442	1.117	1.126	0.822	1.003	0.895
F1RWL1	F-box and leucine rich repeat protein 20 OS=Sus scrofa OX=9823 GN=FBXL20	1.561	Up	0.00166029	FBXL20	48.443	7.5024	8.5	4	4	4	0.912	1.084	0.942	0.657	0.623	0.602
F1RWL6	Hypoxia inducible factor 1 alpha subunit inhibitor OS=Sus scrofa OX=9823 GN=HIF1AN	0.626	Down	3.52e-06	HIF1AN	40.392	11.89	9.7	4	5	4	0.8	0.804	0.826	1.322	1.269	1.292
F1RWT2	Plastin 3 OS=Sus scrofa OX=9823 GN=PLS3	0.818	Down	0.0133002	PLS3	63.85	323.31	40.7	21	56	15	0.845	0.933	0.994	1.121	1.148	1.12
F1RX36	Fibrinogen alpha chain OS=Sus scrofa OX=9823 GN=FGA	1.247	Up	0.045598	FGA	72.612	29.552	12.1	8	11	8	0.945	0.795	0.762	0.662	0.716	0.629
F1RX38	Pleiotropic regulator 1 OS=Sus scrofa OX=9823 GN=PLRG1	1.445	Up	0.040738	PLRG1	56.43	7.6057	6.3	3	3	3	1.096	0.82	1.022	0.75	0.566	0.717
F1RXC5	WAS/WASL-interacting protein family member 2 OS=Sus scrofa OX=9823 GN=WIPF2	0.74	Down	0.0093834	WIPF2	46.34	6.0243	8.4	3	4	3	0.818	1.013	0.89	1.188	1.267	1.221
F1RXC7	Cancer susceptibility 3 OS=Sus scrofa OX=9823 GN=CASC3	1.834	Up	0.0037441	CASC3	69.687	17.154	10.4	6	6	6	1.301	1.156	1.118	0.748	0.653	0.548
F1RXU4	ORM1-like protein OS=Sus scrofa OX=9823 GN=ORMDL1	1.724	Up	0.00045512	ORMDL1	17.357	6.7896	12.4	2	2	2	1.099	1.16	1.264	0.64	0.693	0.71
F1RXW5	Transmembrane protein 177 OS=Sus scrofa OX=9823 GN=TMEM177	1.357	Up	0.0043965	TMEM177	33.809	3.5022	3.5	1	1	1	1	1.055	1.125	0.737	0.763	0.843
F1RZ12	T-complex 11 OS=Sus scrofa OX=9823 GN=TCP11	0.815	Down	0.00185696	TCP11	55.551	55.965	22	11	18	11	0.88	0.911	0.933	1.149	1.067	1.128
F1RZ16	U1 small nuclear ribonucleoprotein C OS=Sus scrofa OX=9823 GN=SNRPC	2.161	Up	0.042037	SNRPC	17.394	2.5386	5.7	1	2	1	0.841	1.36	1.343	0.544	0.547	0.549
F1RZB9	Uncharacterized protein OS=Sus scrofa OX=9823 GN=BCL2L10	2.776	Up	0.00047566	BCL2L10	21.246	7.0567	12	2	3	2	1.46	1.26	1.194	0.496	0.513	0.401
F1RZC4	SEC14 and spectrin domain containing 1 OS=Sus scrofa OX=9823 GN=SESTD1	2.013	Up	0.0292	SESTD1	81.749	5.9822	3.1	2	3	2	1.504	1.296	0.895	0.688	0.695	0.453
F1S057	Myosin IE OS=Sus scrofa OX=9823 GN=MYO1E	0.75	Down	0.0099557	MYO1E	127.28	16.695	7.3	8	8	8	0.956	0.869	0.917	1.102	1.219	1.335
F1S0B2	"RNA binding protein, mRNA processing factor 2 OS=Sus scrofa OX=9823 GN=RBPMS2"	0.466	Down	0.00024099	RBPMS2	23.107	23.359	28.8	6	10	6	0.64	0.75	0.746	1.553	1.433	1.602
F1S0D8	UBX domain protein 4 OS=Sus scrofa OX=9823 GN=UBXN4	1.492	Up	0.00193922	UBXN4	56.592	16.086	6.5	3	3	3	0.99	1.158	1.165	0.721	0.747	0.753
F1S0E7	Akirin-2 OS=Sus scrofa OX=9823 GN=AKIRIN2	1.684	Up	0.0008369	AKIRIN2	22.509	43.429	38.9	9	18	9	1.255	1.141	1.116	0.67	0.657	0.759
F1S0G2	"Arginyl-tRNA synthetase 2, mitochondrial OS=Sus scrofa OX=9823 GN=RARS2"	1.396	Up	0.004217	RARS2	62.51	5.131	7.8	4	4	4	1.061	1.018	1.063	0.692	0.833	0.726
F1S0I7	DEAD-box helicase 43 OS=Sus scrofa OX=9823 GN=DDX43	1.784	Up	0.0144608	DDX43	68.122	2.6844	3	2	2	2	1.414	1.111	1.052	0.815	0.619	0.571
F1S134	H/ACA ribonucleoprotein complex subunit OS=Sus scrofa OX=9823 GN=GAR1	1.643	Up	0.00021686	GAR1	20.943	3.3879	7.9	2	2	2	1.083	1.158	1.15	0.661	0.67	0.733
F1S150	La-related protein 7 OS=Sus scrofa OX=9823 GN=LARP7	0.696	Down	0.0168168	LARP7	66.692	2.162	1.5	1	1	1	0.875	0.994	0.734	1.175	1.312	1.255
F1S1J9	Eukaryotic translation initiation factor 3 subunit H OS=Sus scrofa OX=9823 GN=EIF3H	0.762	Down	0.0040164	EIF3H	37.144	76.796	27.2	10	16	10	0.86	0.906	0.983	1.153	1.2	1.254
F1S1M2	Synaptotagmin like 4 OS=Sus scrofa OX=9823 GN=SYTL4	1.999	Up	0.0046197	SYTL4	76.05	8.7084	8.5	6	6	5	1.615	1.198	1.111	0.618	0.693	0.652
F1S1R4	SH3 domain-binding glutamic acid-rich-like protein OS=Sus scrofa OX=9823 GN=SH3BGRL	1.535	Up	0.00121862	SH3BGRL	12.842	23.96	34.2	4	5	4	1.009	1.119	1.204	0.712	0.735	0.724
F1S1V1	Sjogren syndrome antigen B OS=Sus scrofa OX=9823 GN=SSB	2.422	Up	0.00193924	SSB	47.267	15.636	11.5	5	6	5	1.531	1.143	1.466	0.546	0.502	0.661
F1S216	"NUF2, NDC80 kinetochore complex component OS=Sus scrofa OX=9823 GN=NUF2"	1.33	Up	0.0147797	NUF2	54.456	31.148	11.4	5	5	5	1.114	1.141	1.022	0.871	0.869	0.723
F1S250	Protein maelstrom homolog OS=Sus scrofa OX=9823 GN=MAEL	0.644	Down	0.00045852	MAEL	49.201	6.8352	9.4	4	6	4	0.71	0.769	0.817	1.203	1.165	1.195
F1S346	Kinesin-like protein OS=Sus scrofa OX=9823 GN=KIF2C	1.542	Up	0.00123815	KIF2C	80.638	64.334	21.7	15	23	14	1.182	1.081	1.093	0.765	0.75	0.662
F1S359	"RB binding protein 5, histone lysine methyltransferase complex subunit OS=Sus scrofa OX=9823 GN=RBBP5"	4.458	Up	0.0029591	RBBP5	59.152	7.9556	7.4	4	4	4	1.08	1.353	1.196	0.179	0.394	0.241
F1S386	THO complex 3 OS=Sus scrofa OX=9823 GN=THOC3	1.892	Up	0.0137759	THOC3	38.799	14.043	16	6	7	6	1.606	1.103	1.015	0.648	0.709	0.611
F1S397	Zinc finger homeobox 3 OS=Sus scrofa OX=9823 GN=ZFHX3	0.759	Down	0.00894	ZFHX3	406.01	2.2993	0.4	2	2	2	0.94	0.865	0.802	1.163	1.206	1.068
F1S3B4	IST1-like protein OS=Sus scrofa OX=9823 GN=IST1	0.676	Down	0.00046105	IST1	39.596	15.257	14.9	7	10	7	0.804	0.792	0.878	1.224	1.179	1.259
F1S3K2	"Zinc finger, GATA-like protein 1 OS=Sus scrofa OX=9823 GN=ZGLP1"	0.659	Down	0.0149229	ZGLP1	28.792	2.9809	9.7	2	2	2	0.853	0.673	0.953	1.273	1.208	1.28
F1S3P8	Syntaxin 7 OS=Sus scrofa OX=9823 GN=STX7	1.432	Up	4.13e-05	STX7	29.864	12.254	9.2	2	4	2	1.095	1.151	1.101	0.782	0.791	0.765
F1S413	Mini-chromosome maintenance complex-binding protein OS=Sus scrofa OX=9823 GN=MCMBP	1.403	Up	0.0187971	MCMBP	72.904	1.9216	2.5	2	2	2	1.315	1.078	0.992	0.81	0.768	0.834
F1S459	Uncharacterized protein OS=Sus scrofa OX=9823 GN=TERF2IP	1.412	Up	0.0056614	TERF2IP	44.313	19.579	14.2	5	5	5	0.985	1.021	1.083	0.702	0.672	0.814
F1S4V2	Metastasis associated 1 family member 3 OS=Sus scrofa OX=9823 GN=MTA3	1.375	Up	0.00192126	MTA3	45.625	4.5242	5	2	2	2	1.058	1.091	1.072	0.826	0.716	0.8
F1S534	Down-regulator of transcription 1 OS=Sus scrofa OX=9823 GN=DR1	3.485	Up	0.00059839	DR1	19.429	12.434	15.9	3	4	3	1.291	1.305	1.419	0.45	0.405	0.297
F1S549	Polypyrimidine tract binding protein 2 OS=Sus scrofa OX=9823 GN=PTBP2	0.797	Down	0.019642	PTBP2	57.49	10.11	6.8	4	6	4	0.813	0.979	0.944	1.183	1.151	1.098
F1S563	Dihydrolipoamide acetyltransferase component of pyruvate dehydrogenase complex OS=Sus scrofa OX=9823 GN=DBT	1.402	Up	0.040159	DBT	46.898	3.1864	4	2	2	2	1.463	1.031	1.171	0.902	0.909	0.803
F1S579	HEN methyltransferase 1 OS=Sus scrofa OX=9823 GN=HENMT1	2.76	Up	0.0038022	HENMT1	44.073	22.809	19.3	6	7	6	0.893	1.465	1.257	0.499	0.43	0.381
F1S5Q1	Glutamine-fructose-6-phosphate transaminase 2 OS=Sus scrofa OX=9823 GN=GFPT2	1.983	Up	0.00043929	GFPT2	77.069	2.789	7.6	5	5	2	1.048	1.193	1.22	0.633	0.553	0.559
F1S5R8	Multiple myeloma tumor-associated protein 2 OS=Sus scrofa OX=9823 GN=C1orf35	2.076	Up	0.0029625	C1orf35	26.412	4.021	8.9	2	2	2	0.97	1.18	1.284	0.574	0.472	0.608
F1S5Y5	Syntaxin binding protein 3 OS=Sus scrofa OX=9823 GN=STXBP3	0.775	Down	0.00046112	STXBP3	68.039	10.058	7.7	4	4	4	0.883	0.896	0.899	1.166	1.1	1.19
F1S5Z7	Sortilin OS=Sus scrofa OX=9823 GN=SORT1	0.491	Down	0.00071695	SORT1	101.39	6.6992	2.8	2	2	2	0.692	0.789	0.796	1.371	1.679	1.588
F1S668	Regulator of G protein signaling 16 OS=Sus scrofa OX=9823 GN=RGS16	3.166	Up	0.00043633	RGS16	22.473	2.5394	8.5	2	2	2	1.244	1.15	1.244	0.435	0.406	0.308
F1S6M4	Cadherin 15 OS=Sus scrofa OX=9823 GN=CDH15	0.699	Down	0.010817	CDH15	79.011	3.8864	2.7	2	2	2	0.731	0.877	0.927	1.286	1.134	1.207
F1S718	Uncharacterized protein OS=Sus scrofa OX=9823 GN=LTV1	1.367	Up	0.0038425	LTV1	54.45	28.529	13.5	6	10	6	0.982	1.037	1.13	0.749	0.817	0.737
F1S774	Uncharacterized protein OS=Sus scrofa OX=9823 GN=CHEK1	1.925	Up	3.51e-05	CHEK1	54.358	12.436	11.6	5	5	5	1.144	1.128	1.228	0.589	0.605	0.624
F1S7D3	Uncharacterized protein OS=Sus scrofa OX=9823 GN=LOC100526118	1.702	Up	0.0055443	LOC100526118	25.413	5.0061	11.2	3	5	2	0.97	1.219	1.3	0.733	0.644	0.673
F1S827	SERPINE1 mRNA binding protein 1 OS=Sus scrofa OX=9823 GN=SERBP1	0.801	Down	0.0038814	SERBP1	44.835	89.783	39.1	13	21	13	0.86	0.939	0.945	1.095	1.156	1.174
F1S833	Uncharacterized protein OS=Sus scrofa OX=9823 GN=LRRC40	1.436	Up	0.0053043	LRRC40	68.169	19.783	14.3	8	10	8	1.252	1.092	1.084	0.867	0.742	0.779
F1S845	TATA-box binding protein associated factor 5 OS=Sus scrofa OX=9823 GN=TAF5	1.739	Up	0.0025246	TAF5	86.806	1.7374	1.2	1	1	1	1.098	1.096	1.287	0.717	0.587	0.698
F1S890	Serine/threonine kinase 35 OS=Sus scrofa OX=9823 GN=STK35	1.782	Up	0.0010594	STK35	59.201	3.1779	3.2	1	1	1	1.053	1.189	1.201	0.645	0.584	0.703
F1S8F7	Tetratricopeptide repeat domain 5 OS=Sus scrofa OX=9823 GN=TTC5	1.719	Up	0.00082431	TTC5	51.125	13.243	11.9	5	6	5	1.316	1.146	1.11	0.733	0.676	0.669
F1S8S7	Transforming acidic coiled-coil containing protein 3 OS=Sus scrofa OX=9823 GN=TACC3	1.559	Up	4.43e-05	TACC3	78.668	224.19	35.9	30	51	30	1.052	1.124	1.073	0.682	0.689	0.713
F1S8T7	Nucleophosmin/nucleoplasmin 3 OS=Sus scrofa OX=9823 GN=NPM3	1.777	Up	0.00020281	NPM3	19.11	7.2364	18.2	3	3	3	1.074	1.169	1.179	0.632	0.611	0.683
F1S924	Coiled-coil domain containing 124 OS=Sus scrofa OX=9823 GN=CCDC124	0.801	Down	0.00196272	CCDC124	25.887	10.822	16.6	4	4	4	0.902	0.916	0.863	1.095	1.081	1.172
F1S939	Microtubule-associated protein 1S OS=Sus scrofa OX=9823 GN=MAP1S	0.108	Down	9.1e-08	MAP1S	112.6	2.1768	1.9	2	2	2	0.267	0.243	0.249	2.334	2.303	2.368
F1S980	Uncharacterized protein OS=Sus scrofa OX=9823 GN=BTBD10	1.656	Up	0.0057806	BTBD10	52.376	6.879	10.4	4	4	4	0.915	1.119	1.143	0.578	0.628	0.713
F1S9F2	Histone RNA hairpin-binding protein OS=Sus scrofa OX=9823 GN=SLBP	3.618	Up	0.00010268	SLBP	30.962	25.466	9.8	3	3	3	1.487	1.238	1.161	0.373	0.331	0.37
F1S9J0	Non-specific serine/threonine protein kinase OS=Sus scrofa OX=9823 GN=MARK1	0.681	Down	0.0156228	MARK1	87.162	4.777	5.3	3	3	1	1.041	0.979	0.764	1.312	1.359	1.416
F1S9T0	DnaJ heat shock protein family (Hsp40) member B4 OS=Sus scrofa OX=9823 GN=DNAJB4	3.348	Up	0.0083622	DNAJB4	37.865	9.2422	14.2	4	5	3	1.915	1.133	0.883	0.38	0.446	0.348
F1S9W3	Calcium homeostasis endoplasmic reticulum protein OS=Sus scrofa OX=9823 GN=CHERP	2.301	Up	0.000183455	CHERP	103.83	18.536	6.7	6	8	6	1.197	1.295	1.335	0.502	0.556	0.605
F1SA10	REST corepressor 1 OS=Sus scrofa OX=9823 GN=RCOR1	1.315	Up	0.000623	RCOR1	53.438	5.5609	8	3	3	3	1.157	1.073	1.165	0.869	0.869	0.844
F1SA62	Uncharacterized protein OS=Sus scrofa OX=9823 GN=NDUFA7	0.754	Down	0.0026024	NDUFA7	12.628	9.7107	25.7	3	4	3	0.88	0.84	0.865	1.102	1.091	1.235
F1SA79	Mitogen-activated protein kinase kinase 7 OS=Sus scrofa OX=9823 GN=MAP2K7	1.289	Up	0.0027804	MAP2K7	47.552	4.5415	4.8	2	2	2	1.059	1.067	1.108	0.782	0.886	0.841
F1SAB3	"Golgi associated, gamma adaptin ear containing, ARF binding protein 2 OS=Sus scrofa OX=9823 GN=GGA2"	0.601	Down	0.005122	GGA2	74.371	10.549	7	4	4	4	0.861	0.685	0.886	1.335	1.254	1.458
F1SAE9	Laminin subunit beta 1 OS=Sus scrofa OX=9823 GN=LAMB1	1.353	Up	0.0034414	LAMB1	194.18	9.9364	3.6	6	6	6	1.092	0.984	1.142	0.774	0.825	0.779
F1SAG3	Chitobiase OS=Sus scrofa OX=9823 GN=CTBS	1.63	Up	0.002797	CTBS	43.028	9.944	8.9	4	8	4	1.259	1.005	1.102	0.722	0.643	0.7
F1SB43	Synaptotagmin like 3 OS=Sus scrofa OX=9823 GN=SYTL3	0.694	Down	0.00036365	SYTL3	68.324	68.666	16.4	10	12	10	0.808	0.857	0.884	1.245	1.25	1.177
F1SB61	Pre-mRNA-splicing regulator WTAP isoform 1 OS=Sus scrofa OX=9823 GN=WTAP	1.698	Up	0.000102443	WTAP	43.985	25.697	15.7	5	5	5	1.116	1.136	1.197	0.673	0.711	0.647
F1SB65	"PARN like, ribonuclease domain containing 1 OS=Sus scrofa OX=9823 GN=PNLDC1"	0.808	Down	0.0110439	PNLDC1	59.224	25.31	16.8	9	13	9	0.981	0.907	0.837	1.154	1.122	1.097
F1SBC5	"NDC80, kinetochore complex component OS=Sus scrofa OX=9823 GN=NDC80"	1.352	Up	0.0007232	NDC80	73.907	58.15	27.6	18	20	18	1.021	1.072	1.031	0.75	0.746	0.815
F1SBF0	Nuclear receptor coactivator 3 OS=Sus scrofa OX=9823 GN=NCOA3	2.152	Up	0.0091227	NCOA3	150.96	213.24	17.9	21	30	4	0.817	1.311	1.234	0.579	0.496	0.487
F1SBH2	Protein transport protein Sec23B OS=Sus scrofa OX=9823 GN=SEC23B	0.603	Down	0.00043981	SEC23B	86.473	57.187	10.2	6	6	5	0.82	0.774	0.894	1.314	1.402	1.41
F1SBP8	Monocarboxylate transporter 1 OS=Sus scrofa OX=9823 GN=SLC16A1	0.626	Down	0.042058	SLC16A1	52.245	4.8848	5	2	4	2	0.579	0.916	0.946	1.327	1.394	1.179
F1SBQ5	Monocarboxylate transporter 1 OS=Sus scrofa OX=9823 GN=SLC16A1	0.466	Down	0.0079591	SLC16A1	51.706	3.134	4	2	2	2	0.565	0.62	0.726	1.521	1.55	1.027
F1SBW4	Protein quaking OS=Sus scrofa OX=9823 GN=QKI	2.575	Up	0.00174225	QKI	28.651	2.7246	3.8	1	1	1	1.804	1.32	1.235	0.514	0.595	0.584
F1SC47	Delta-1-pyrroline-5-carboxylate synthase OS=Sus scrofa OX=9823 GN=ALDH18A1	1.293	Up	0.034077	ALDH18A1	87.085	27.937	16.4	12	16	12	1.145	1.178	0.99	0.866	0.937	0.76
F1SC64	"Helicase, lymphoid specific OS=Sus scrofa OX=9823 GN=HELLS"	2.711	Up	0.0187959	HELLS	97.011	2.0435	2.4	2	3	2	1.13	1.014	1.272	0.533	0.497	0.23
F1SC75	Zinc finger SWIM-type containing 3 OS=Sus scrofa OX=9823 GN=ZSWIM3	2.324	Up	0.006378	ZSWIM3	78.656	124.72	35.5	19	32	19	1.32	1.283	1.282	0.595	0.485	0.592
F1SC78	Ubiquitin conjugating enzyme E2 C OS=Sus scrofa OX=9823 GN=UBE2C	2.455	Up	0.00063912	UBE2C	19.642	23.704	22.3	4	5	4	1.447	1.249	1.148	0.555	0.553	0.458
F1SC89	Kinesin family member 11 OS=Sus scrofa OX=9823 GN=KIF11	1.621	Up	0.00071848	KIF11	119.4	15.945	7.6	8	8	8	0.988	1.135	1.155	0.662	0.668	0.692
F1SCH5	XPA binding protein 2 OS=Sus scrofa OX=9823 GN=XAB2	1.274	Up	0.032943	XAB2	100	2.2451	1.1	1	1	1	0.921	1.043	1.117	0.832	0.729	0.858
F1SCI4	Uncharacterized protein OS=Sus scrofa OX=9823 GN=AKAP13	0.707	Down	0.047382	AKAP13	160.03	10.633	3.2	4	4	4	0.694	1.039	0.896	1.183	1.358	1.179
F1SCZ9	Uncharacterized protein OS=Sus scrofa OX=9823 GN=ASAH2	1.268	Up	0.0053233	ASAH2	85.223	25.385	9.6	6	8	6	1.238	1.114	1.126	0.884	0.895	0.964
F1SD82	Syntaxin 10 OS=Sus scrofa OX=9823 GN=STX10	1.536	Up	0.0033599	STX10	28.241	17.438	4.4	1	1	1	1.046	1.134	1.23	0.695	0.709	0.816
F1SDX6	Transglutaminase 2 OS=Sus scrofa OX=9823 GN=TGM2	0.541	Down	0.0025802	TGM2	77.211	14.63	7.9	5	5	5	0.749	0.637	0.706	1.472	1.273	1.124
F1SE06	Activator of HSP90 ATPase activity 1 OS=Sus scrofa OX=9823 GN=AHSA1	1.262	Up	0.0190996	AHSA1	38.33	90.496	29	10	22	10	0.904	1.029	1.084	0.769	0.781	0.841
F1SE53	Mast/stem cell growth factor receptor OS=Sus scrofa OX=9823 GN=KIT	0.567	Down	0.00033912	KIT	109.06	11.826	5.9	6	6	6	0.698	0.772	0.784	1.32	1.25	1.406
F1SE99	Zygote arrest protein 1 OS=Sus scrofa OX=9823 GN=ZAR1	0.373	Down	3.57e-05	ZAR1	42.244	323.31	33.1	15	27	15	0.56	0.627	0.651	1.689	1.61	1.63
F1SEA5	Ubiquitin associated protein 2 OS=Sus scrofa OX=9823 GN=UBAP2	0.808	Down	0.0056595	UBAP2	115.54	59.539	10.2	9	11	9	1.039	0.928	0.966	1.159	1.244	1.229
F1SEB1	Ubiquitin-associated protein 1 OS=Sus scrofa OX=9823 GN=UBAP1	0.497	Down	0.0003986	UBAP1	54.907	7.1057	8.6	4	5	4	0.799	0.678	0.669	1.526	1.403	1.392
F1SF87	Solute carrier family 25 member 13 OS=Sus scrofa OX=9823 GN=SLC25A13	1.219	Up	0.0138041	SLC25A13	74.329	89.481	27.2	18	27	16	1.156	1.063	1.032	0.888	0.94	0.839
F1SF95	Peptidyl-prolyl cis-trans isomerase OS=Sus scrofa OX=9823 GN=PPIH	1.246	Up	0.036776	PPIH	19.208	3.4954	10.2	2	3	2	1.171	1.063	1.053	0.775	0.962	0.9
F1SFJ4	Lymphoid restricted membrane protein OS=Sus scrofa OX=9823 GN=LRMP	1.353	Up	0.0074769	LRMP	50.726	2.2022	2.7	1	1	1	0.978	1.134	1.164	0.768	0.815	0.838
F1SFR3	"Extra spindle pole bodies like 1, separase OS=Sus scrofa OX=9823 GN=ESPL1"	1.848	Up	0.00047914	ESPL1	229.73	53.188	9.5	19	20	19	1.108	1.238	1.228	0.657	0.588	0.689
F1SFU0	Y-box binding protein 2 OS=Sus scrofa OX=9823 GN=YBX2	0.55	Down	0.0047824	YBX2	38.116	323.31	60	18	58	16	0.788	0.78	0.787	1.318	1.517	1.445
F1SFW4	Integrator complex subunit 3 OS=Sus scrofa OX=9823 GN=INTS3	1.439	Up	0.0095607	INTS3	117.85	35.79	4.8	3	4	3	1.185	1.013	1.187	0.877	0.731	0.745
F1SG83	"VPS8, CORVET complex subunit OS=Sus scrofa OX=9823 GN=VPS8"	0.662	Down	0.0114424	VPS8	158.67	5.567	2.7	4	4	4	0.99	0.721	0.869	1.239	1.326	1.333
F1SGC6	Uncharacterized protein OS=Sus scrofa OX=9823 GN=NDUFB5	0.779	Down	0.031823	NDUFB5	21.554	3.1303	8.5	2	4	2	0.754	0.98	0.894	1.122	1.159	1.091
F1SGC8	Actin like 6A OS=Sus scrofa OX=9823 GN=ACTL6A	2.313	Up	0.0119769	ACTL6A	47.47	32.668	13.8	5	7	5	1.19	1.002	1.189	0.631	0.502	0.329
F1SGG1	Keratin 18 OS=Sus scrofa OX=9823 GN=KRT18	1.597	Up	0.0015762	KRT18	47.417	4.0276	4.3	2	3	2	1.253	1.067	1.073	0.749	0.702	0.674
F1SGW7	Adhesion molecule with Ig like domain 2 OS=Sus scrofa OX=9823 GN=AMIGO2	0.546	Down	0.0081214	AMIGO2	58.301	1.6953	1.5	1	2	1	0.705	0.68	0.986	1.581	1.372	1.393
F1SGX2	MORC family CW-type zinc finger 3 OS=Sus scrofa OX=9823 GN=MORC3	1.548	Up	0.00069933	MORC3	93.513	52.9	12.5	8	9	8	1.219	1.117	1.088	0.742	0.696	0.774
F1SH24	TBC1 domain family member 15 OS=Sus scrofa OX=9823 GN=TBC1D15	1.759	Up	3.93e-05	TBC1D15	74.667	50.54	12.9	8	9	8	1.216	1.14	1.154	0.681	0.676	0.638
F1SH64	Nucleoporin 107 OS=Sus scrofa OX=9823 GN=NUP107	1.747	Up	0.0054597	NUP107	106.68	55.155	10.6	8	11	8	1.433	1.052	1.093	0.652	0.685	0.711
F1SHE2	Par-3 family cell polarity regulator beta OS=Sus scrofa OX=9823 GN=PARD3B	0.722	Down	0.00025547	PARD3B	113.34	13.062	5	5	5	5	0.815	0.889	0.864	1.2	1.171	1.186
F1SHH9	1-aminocyclopropane-1-carboxylate synthase homolog (inactive) like OS=Sus scrofa OX=9823 GN=ACCSL	2.166	Up	4.32e-05	ACCSL	64.624	323.31	44.2	22	100	22	1.217	1.248	1.172	0.565	0.592	0.522
F1SI06	High density lipoprotein binding protein OS=Sus scrofa OX=9823 GN=HDLBP	0.528	Down	2.15e-05	HDLBP	141.54	35.967	7.2	9	11	9	0.822	0.811	0.78	1.593	1.472	1.504
F1SIB9	ADP-ribosylation factor GTPase-activating protein 2 OS=Sus scrofa OX=9823 GN=ARFGAP2	0.643	Down	1.21e-06	ARFGAP2	56.673	14.574	16	8	9	8	0.831	0.818	0.822	1.269	1.307	1.267
F1SIE7	Enhancer of mRNA decapping 3 OS=Sus scrofa OX=9823 GN=EDC3	0.672	Down	0.0070179	EDC3	55.992	15.057	11.4	5	6	5	0.727	0.818	0.947	1.224	1.287	1.2
F1SIF8	Nucleoporin 160 OS=Sus scrofa OX=9823 GN=NUP160	1.327	Up	0.00028235	NUP160	158.36	8.1493	4.1	6	7	6	1.071	1.08	1.066	0.845	0.781	0.798
F1SIR4	Uncharacterized protein OS=Sus scrofa OX=9823 GN=MIA2	1.249	Up	0.027215	MIA2	88.942	72.049	21.7	15	21	15	0.933	1.037	1.149	0.865	0.799	0.834
F1SIZ4	Testis expressed 264 OS=Sus scrofa OX=9823 GN=TEX264	0.35	Down	0.0137045	TEX264	33.961	3.7606	8	2	2	2	0.327	0.559	0.795	1.426	1.711	1.666
F1SJ93	Reticulocalbin-2 precursor OS=Sus scrofa OX=9823 GN=RCN2	1.201	Up	0.007539	RCN2	36.248	58.998	29.1	8	18	8	1.157	1.043	1.063	0.926	0.874	0.917
F1SJB5	Annexin OS=Sus scrofa OX=9823 GN=ANXA1	0.326	Down	0.0082774	ANXA1	38.744	56.653	18.5	5	7	5	0.782	0.372	0.584	1.977	1.444	1.915
F1SJG2	KN motif and ankyrin repeat domains 1 OS=Sus scrofa OX=9823 GN=KANK1	1.574	Up	0.0039766	KANK1	147.85	25.446	3.8	5	5	5	1.114	1.213	0.954	0.733	0.673	0.678
F1SJJ8	TIMELESS interacting protein OS=Sus scrofa OX=9823 GN=TIPIN	1.499	Up	0.0010025	TIPIN	32.88	1.5504	3.1	1	1	1	1.248	1.154	1.118	0.802	0.731	0.815
F1SJL5	Caseinolytic mitochondrial matrix peptidase chaperone subunit OS=Sus scrofa OX=9823 GN=CLPX	1.302	Up	0.0092393	CLPX	67.42	16.452	9.9	6	6	6	1.189	1.09	1.132	0.791	0.889	0.939
F1SJR4	ADP ribosylation factor GTPase activating protein 3 OS=Sus scrofa OX=9823 GN=ARFGAP3	0.711	Down	0.041484	ARFGAP3	57.023	24.847	14.5	8	9	8	0.743	0.927	0.916	1.193	1.238	1.205
F1SJR5	Protein kinase C and casein kinase substrate in neurons 2 OS=Sus scrofa OX=9823 GN=PACSIN2	1.216	Up	0.0047599	PACSIN2	55.602	194.8	32.9	13	17	13	1.154	1.069	1.089	0.946	0.912	0.866
F1SJZ3	Uncharacterized protein OS=Sus scrofa OX=9823 GN=BOD1	3.008	Up	2.1e-07	BOD1	19.297	81.551	41.4	7	11	7	1.301	1.314	1.274	0.443	0.42	0.43
F1SK02	Arpin OS=Sus scrofa OX=9823 GN=ARPIN	1.443	Up	5.66e-05	ARPIN	24.625	11.571	24.9	5	5	5	1.19	1.169	1.174	0.841	0.821	0.787
F1SK26	Survival motor neuron protein OS=Sus scrofa OX=9823 GN=SMN1	1.749	Up	9.95e-05	SMN1	31.641	4.6951	10.2	2	2	1	1.311	1.212	1.186	0.688	0.7	0.733
F1SKK3	NCK interacting protein with SH3 domain OS=Sus scrofa OX=9823 GN=NCKIPSD	0.806	Down	1.51e-05	NCKIPSD	78.147	33.916	5.7	3	3	3	0.928	0.913	0.935	1.151	1.14	1.152
F1SKQ0	DEAD-box helicase 17 OS=Sus scrofa OX=9823 GN=DDX17	1.666	Up	0.00038247	DDX17	70.58	47.101	27	16	27	11	1.211	1.15	1.043	0.672	0.701	0.67
F1SLL4	DEAD (Asp-Glu-Ala-Asp) box polypeptide 4 OS=Sus scrofa OX=9823 GN=DDX4	0.703	Down	0.00079978	DDX4	79.781	129.2	26.2	16	23	14	0.945	0.89	0.849	1.265	1.326	1.225
F1SLL6	Mtr4 exosome RNA helicase OS=Sus scrofa OX=9823 GN=MTREX	1.49	Up	0.000183435	MTREX	117.86	5.8802	3.3	4	4	4	1.121	1.125	1.152	0.8	0.724	0.757
F1SM14	Secreted phosphoprotein 24 OS=Sus scrofa OX=9823 GN=SPP2	0.793	Down	0.021043	SPP2	23.123	-2	34.3	8	14	1	0.819	1.007	0.913	1.204	1.128	1.123
F1SMD1	DAB2 interacting protein OS=Sus scrofa OX=9823 GN=DAB2IP	1.232	Up	0.00151652	DAB2IP	127.49	90.646	16.7	19	26	19	1.066	1.047	1.07	0.841	0.836	0.907
F1SME6	"Proteasome 26S subunit, non-ATPase 5 OS=Sus scrofa OX=9823 GN=PSMD5"	1.234	Up	0.0187984	PSMD5	52.169	71.696	23.6	9	12	9	1.212	1.029	1.051	0.905	0.905	0.857
F1SMG6	Poly(A) binding protein interacting protein 1 OS=Sus scrofa OX=9823 GN=PAIP1	0.799	Down	0.047379	PAIP1	44.739	46.605	16.2	7	14	7	0.771	0.992	0.945	1.086	1.12	1.185
F1SMI8	Complement component C6 precursor OS=Sus scrofa OX=9823 GN=C6	1.233	Up	0.0191425	C6	104.63	32.506	12.5	13	19	13	0.601	0.708	0.611	0.534	0.505	0.518
F1SMJ6	Complement component C9 precursor OS=Sus scrofa OX=9823 GN=C9	1.216	Up	0.034899	C9	62.441	39.962	18.6	10	18	10	0.7	0.713	0.661	0.581	0.618	0.506
F1SMR7	Ubiquitin conjugating enzyme E2 H OS=Sus scrofa OX=9823 GN=UBE2H	1.785	Up	2.29e-06	UBE2H	19.985	21.858	28	4	7	4	1.149	1.207	1.151	0.661	0.656	0.648
F1SMV6	Nucleolin OS=Sus scrofa OX=9823 GN=NCL	0.785	Down	0.00125713	NCL	78.227	41.034	16.4	14	20	14	0.878	0.914	0.89	1.196	1.089	1.13
F1SN33	Myosin IB OS=Sus scrofa OX=9823 GN=MYO1B	0.689	Down	4.14e-05	MYO1B	120.02	71.737	22	23	28	23	0.844	0.887	0.847	1.273	1.226	1.245
F1SNF2	Muskelin 1 OS=Sus scrofa OX=9823 GN=MKLN1	1.32	Up	0.0195224	MKLN1	80.479	2.6619	1.7	1	1	1	1.239	1.052	1.127	0.85	0.954	0.785
F1SP04	Ankycorbin OS=Sus scrofa OX=9823 GN=RAI14	0.411	Down	7.5e-05	RAI14	107.84	10.243	5	5	7	5	0.671	0.605	0.661	1.548	1.473	1.695
F1SP18	Threonyl-tRNA synthetase OS=Sus scrofa OX=9823 GN=TARS	1.206	Up	0.0042552	TARS	76.963	66.113	21.4	14	20	14	1.061	1.062	1.012	0.912	0.829	0.858
F1SP24	Transmembrane protein 245 OS=Sus scrofa OX=9823 GN=TMEM245	0.468	Down	0.000117254	TMEM245	99.258	4.5256	4.6	4	4	4	0.728	0.654	0.674	1.429	1.576	1.384
F1SPF3	DNA helicase OS=Sus scrofa OX=9823 GN=MCM2	1.635	Up	0.0013014	MCM2	101.53	74.972	18.6	15	20	15	1.052	1.206	1.249	0.745	0.728	0.672
F1SPI2	"XPC complex subunit, DNA damage recognition and repair factor OS=Sus scrofa OX=9823 GN=XPC"	1.227	Up	0.00130013	XPC	105.35	6.7547	4.6	4	4	4	1.046	1.018	1.058	0.84	0.819	0.885
F1SPK2	Histone H1oo OS=Sus scrofa OX=9823 GN=H1FOO	2.418	Up	1.67e-05	H1FOO	36.449	171.87	37.6	13	24	13	1.344	1.297	1.209	0.53	0.544	0.518
F1SPZ5	Calcium-transporting ATPase OS=Sus scrofa OX=9823 GN=ATP2B1	0.791	Down	0.0181225	ATP2B1	133.79	88.761	11.5	12	14	8	0.878	0.966	0.873	1.135	1.249	1.049
F1SQ05	Phosphate-regulating neutral endopeptidase OS=Sus scrofa OX=9823 GN=PHEX	0.538	Down	0.00198407	PHEX	86.307	12.108	6.8	5	7	5	0.68	0.722	0.894	1.361	1.491	1.415
F1SQ17	IQ motif containing B1 OS=Sus scrofa OX=9823 GN=IQCB1	1.439	Up	0.0029432	IQCB1	69.187	51.574	20.2	12	15	12	1.184	1.007	1.162	0.79	0.742	0.798
F1SQ46	Y-box binding protein 3 OS=Sus scrofa OX=9823 GN=YBX3	0.19	Down	0.00136188	YBX3	32.694	5.8029	12.2	3	6	1	0.415		0.29	1.935	1.707	1.938
F1SQ87	WW domain binding protein 11 OS=Sus scrofa OX=9823 GN=WBP11	1.42	Up	0.037961	WBP11	70.058	2.8051	3.1	2	2	2	1.334	0.936	1.212	0.814	0.768	0.87
F1SQF7	Transcriptional adapter 3 OS=Sus scrofa OX=9823 GN=TADA3	1.587	Up	0.0031381	TADA3	48.934	51.554	21.1	8	13	8	0.964	1.184	1.198	0.686	0.704	0.719
F1SQH4	DNA mismatch repair protein OS=Sus scrofa OX=9823 GN=MSH2	1.482	Up	0.0005597	MSH2	103.19	56.749	13	13	14	13	1.145	1.161	1.042	0.78	0.75	0.729
F1SQN4	Non-specific serine/threonine protein kinase OS=Sus scrofa OX=9823 GN=RPS6KA3	0.607	Down	6.27e-05	RPS6KA3	80.708	69.603	21.1	14	16	9	0.777	0.812	0.814	1.329	1.369	1.259
F1SQR0	"RB binding protein 7, chromatin remodeling factor OS=Sus scrofa OX=9823 GN=RBBP7"	2.029	Up	0.00021925	RBBP7	47.834	52.312	23.5	10	20	3	1.303	1.134	1.149	0.569	0.629	0.569
F1SQR4	Small nuclear ribonucleoprotein F OS=Sus scrofa OX=9823 GN=SNRPF	1.554	Up	0.035375	SNRPF	9.7251	1.6859	9.3	1	1	1	0.817	1.246	1.043	0.595	0.74	0.664
F1SR50	Uncharacterized protein OS=Sus scrofa OX=9823 GN=LOC100621706	2.909	Up	0.00193909	LOC100621706	17.56	26.999	41.8	7	18	7	1.236	1.13	1.422	0.446	0.332	0.524
F1SRJ8	Phenylalanine hydroxylase OS=Sus scrofa OX=9823 GN=PAH	0.745	Down	0.0087153	PAH	45.756	17.6	15.7	6	8	6	0.999	0.886	0.89	1.32	1.13	1.275
F1SRU7	Protein kinase C eta type OS=Sus scrofa OX=9823 GN=PRKCH	1.635	Up	0.049301	PRKCH	77.797	4.7079	2.9	2	2	2	1.493	0.863	1.102	0.738	0.628	0.749
F1SRY9	Angio associated migratory cell protein OS=Sus scrofa OX=9823 GN=AAMP	1.766	Up	0.028895	AAMP	41.988	19.643	13.1	4	6	4	0.897	1.281	1.517	0.652	0.776	0.664
F1SRZ4	Uncharacterized protein OS=Sus scrofa OX=9823 GN=ARHGAP11A	2.2	Up	0.00131818	ARHGAP11A	112.6	2.2959	2.1	2	2	2	1.007	1.248	1.322	0.487	0.572	0.567
F1SRZ7	RNA helicase aquarius OS=Sus scrofa OX=9823 GN=AQR	1.23	Up	0.0052391	AQR	168.25	7.7817	2.1	3	3	3	1.156	1.051	1.047	0.875	0.913	0.857
F1SSF6	DNA-directed DNA/RNA polymerase mu OS=Sus scrofa OX=9823 GN=POLM	0.654	Down	0.015638	POLM	60.003	12.337	5.2	2	2	2	0.929	0.844	0.806	1.111	1.293	1.542
F1SSG6	Sialic acid synthase OS=Sus scrofa OX=9823 GN=NANS	1.783	Up	0.0029209	NANS	28.413	7.1707	11.2	3	5	3	1.248	1.354	1.075	0.754	0.691	0.617
F1SSH4	NudC domain containing 3 OS=Sus scrofa OX=9823 GN=NUDCD3	0.817	Down	0.0094809	NUDCD3	40.122	48.19	33.1	13	20	13	1.018	0.921	0.905	1.14	1.213	1.126
F1SSH7	Transmembrane p24 trafficking protein 4 OS=Sus scrofa OX=9823 GN=TMED4	1.229	Up	0.035398	TMED4	24.957	6.5831	9.3	2	2	2	1.029	1.158	1.078	0.961	0.904	0.792
F1SSR3	Kinetochore localized astrin/SPAG5 binding protein OS=Sus scrofa OX=9823 GN=KNSTRN	1.752	Up	0.0115573	KNSTRN	26.753	4.2474	8.9	2	2	2	1.02	1.434	1.144	0.589	0.764	0.701
F1ST84	Non-specific serine/threonine protein kinase OS=Sus scrofa OX=9823 GN=MELK	1.403	Up	0.0073013	MELK	70.261	21.563	11.4	7	9	2	1.145	1.072	1.211	0.906	0.793	0.745
F1ST91	Serine/threonine kinase 31 OS=Sus scrofa OX=9823 GN=STK31	0.809	Down	7.87e-05	STK31	111.82	55.4	13.4	12	13	12	0.979	0.98	0.969	1.22	1.222	1.177
F1STD1	Semaphorin 4C OS=Sus scrofa OX=9823 GN=SEMA4C	2.716	Up	0.0030624	SEMA4C	92.504	2.1737	1.4	1	1	1	1.849	1.238	1.134	0.543	0.513	0.498
F1STE6	Thioredoxin domain containing 9 OS=Sus scrofa OX=9823 GN=TXNDC9	1.906	Up	3.55e-05	TXNDC9	26.488	33.655	14.2	4	6	4	1.152	1.095	1.172	0.626	0.585	0.583
F1STG2	CCR4-NOT transcription complex subunit 11 OS=Sus scrofa OX=9823 GN=CNOT11	0.743	Down	0.00123551	CNOT11	55.481	13.473	20.1	8	9	8	0.807	0.87	0.908	1.144	1.147	1.188
F1STV0	Prolylcarboxypeptidase OS=Sus scrofa OX=9823 GN=PRCP	1.217	Up	0.030637	PRCP	56.012	32.414	4.7	2	2	2	1.207	1.184	1.16	0.978	0.87	1.07
F1SUD8	Caspase recruitment domain-containing protein 19 isoform 2 OS=Sus scrofa OX=9823 GN=CARD19	0.703	Down	0.020064	CARD19	18.51	5.7505	8	1	1	1	0.873	0.748	0.949	1.338	1.241	1.077
F1SUG4	Uncharacterized protein OS=Sus scrofa OX=9823 GN=ELOB	0.778	Down	0.031703	ELOB	13.17	96.109	65.3	8	14	8	0.837	0.972	0.946	1.189	1.173	1.179
F1SUG7	DEAD (Asp-Glu-Ala-Asp) box helicase 21 OS=Sus scrofa OX=9823 GN=DDX21	2.619	Up	3e-06	DDX21	87.193	39.436	11.4	9	10	9	1.309	1.393	1.305	0.495	0.503	0.532
F1SUQ8	Uncharacterized protein OS=Sus scrofa OX=9823 GN=RCC2	1.261	Up	0.025338	RCC2	56.085	34.721	22.7	10	12	10	1.061	1.003	1.171	0.794	0.834	0.937
F1SUW3	EF-hand domain family member D2 OS=Sus scrofa OX=9823 GN=EFHD2	0.832	Down	0.0120211	EFHD2	26.642	5.9027	13	3	3	3	0.927	0.885	0.976	1.054	1.173	1.122
F1SV35	Aminoadipate-semialdehyde dehydrogenase-phosphopantetheinyl transferase OS=Sus scrofa OX=9823 GN=AASDHPPT	1.481	Up	0.0113603	AASDHPPT	35.353	18.446	13.4	4	6	4	1.383	1.105	1.065	0.834	0.812	0.753
F1SV40	Splicing factor 3a subunit 3 OS=Sus scrofa OX=9823 GN=SF3A3	1.394	Up	0.0051027	SF3A3	58.891	6.1879	5.4	3	4	3	1.432	1.207	1.209	0.925	0.944	0.891
F1SVA6	Small nuclear ribonucleoprotein U5 subunit 40 OS=Sus scrofa OX=9823 GN=SNRNP40	1.511	Up	0.00022122	SNRNP40	39.351	15.568	9.8	3	3	3	1.016	1.076	1.115	0.732	0.701	0.689
F1SX62	Versican core protein precursor OS=Sus scrofa OX=9823 GN=VCAN	1.384	Up	0.0062616	VCAN	74.565	21.24	8.4	6	9	6	1.033	1.152	1.24	0.839	0.776	0.86
F2Z564	DDB1 and CUL4 associated factor 7 OS=Sus scrofa OX=9823 GN=DCAF7	1.453	Up	0.0156173	DCAF7	38.926	17.484	8.8	3	3	3	1.06	1.115	1.017	0.724	0.622	0.851
F2Z5D8	WD40 repeat-containing protein SMU1 OS=Sus scrofa OX=9823 GN=SMU1	1.902	Up	0.0006208	SMU1	57.543	12.196	11.7	6	6	6	1.197	1.078	1.078	0.627	0.524	0.612
F2Z5F7	Protein dpy-30 homolog OS=Sus scrofa OX=9823 GN=DPY30	1.399	Up	0.0168007	DPY30	11.25	3.0184	9.1	1	1	1	0.968	1.188	1.154	0.839	0.704	0.823
F2Z5I8	Ras-related protein Rab-8A OS=Sus scrofa OX=9823 GN=RAB8A	0.793	Down	0.037395	RAB8A	26.63	8.2746	22.9	6	11	3	0.824	0.966	0.88	1.129	1.133	1.107
F2Z5J5	Enhancer of rudimentary homolog OS=Sus scrofa OX=9823 GN=ERH	1.279	Up	0.0048443	ERH	12.259	5.7327	29.8	3	3	3	1.018	0.969	1.12	0.823	0.804	0.802
F2Z5J6	General transcription factor IIB OS=Sus scrofa OX=9823 GN=GTF2B	1.734	Up	0.00028364	GTF2B	34.833	52.276	29.4	8	9	8	1.233	1.078	1.137	0.687	0.67	0.632
F2Z5Q1	Charged multivesicular body protein 2b OS=Sus scrofa OX=9823 GN=CHMP2B	1.267	Up	0.00159567	CHMP2B	23.934	13.536	24.4	6	7	6	1.036	1.049	1.127	0.853	0.864	0.818
F2Z5W0	c-Myc-binding protein OS=Sus scrofa OX=9823 GN=RRAGC	0.659	Down	0.0087167	RRAGC	14.044	13.215	44.4	7	17	2	0.692	0.888	0.901	1.286	1.2	1.28
F6PYW2	Histone cluster 1 H1 family member d OS=Sus scrofa OX=9823 GN=HIST1H1D	0.489	Down	4.14e-05	HIST1H1D	27.675	4.5052	16.5	6	8	3	0.752	0.696	0.706	1.387	1.519	1.501
H9KVH0	Importin subunit alpha OS=Sus scrofa OX=9823 GN=KPNA7	1.831	Up	0.0027239	KPNA7	55.536	64.068	14.6	8	15	8	0.891	1.088	1.181	0.59	0.6	0.536
I3L5A1	Lysine methyltransferase 2C OS=Sus scrofa OX=9823 GN=KMT2C	4.755	Up	0.00060244	KMT2C	453.3	6.1383	0.8	4	4	4	1.55	1.294	1.374	0.311	0.36	0.216
I3L5C1	SAS-6 centriolar assembly protein OS=Sus scrofa OX=9823 GN=SASS6	1.959	Up	9.53e-05	SASS6	72.951	67.176	17.9	12	12	12	1.186	1.203	1.294	0.606	0.606	0.668
I3L5C7	Ubiquitin associated protein 2 like OS=Sus scrofa OX=9823 GN=UBAP2L	0.765	Down	0.00080051	UBAP2L	106.32	80.875	9.9	8	9	4	0.996	0.935	0.91	1.209	1.26	1.245
I3L611	Zinc finger protein 19 OS=Sus scrofa OX=9823 GN=ZNF19	0.261	Down	0.00048473	ZNF19	47.558	13.788	7.3	1	1	1	0.557	0.407	0.502	1.737	1.656	2.221
I3L640	Bromodomain containing 7 OS=Sus scrofa OX=9823 GN=BRD7	1.94	Up	0.018721	BRD7	74.091	10.51	6.6	4	4	4	1.144	1.097	1.132	0.521	0.527	0.691
I3L664	Amyloid beta precursor protein binding family A member 1 OS=Sus scrofa OX=9823 GN=APBA1	0.705	Down	0.0121796	APBA1	91.529	57.551	10	6	9	6	0.989	0.805	0.785	1.149	1.299	1.21
I3L6X7	Vacuolar-sorting protein SNF8 OS=Sus scrofa OX=9823 GN=SNF8	0.753	Down	0.038115	SNF8	28.88	6.6998	9.7	2	2	2	0.732	1	0.92	1.133	1.169	1.219
I3L7M6	Ubiquitinyl hydrolase 1 OS=Sus scrofa OX=9823	1.413	Up	0.002422	---	36.91	37.929	7	2	2	2	1.193	1.15	1.218	0.907	0.845	0.768
I3L7N6	Uncharacterized protein OS=Sus scrofa OX=9823 GN=CCZ1	1.247	Up	0.0092169	CCZ1	55.627	16.123	14.9	6	8	6	1.031	1.03	1.145	0.876	0.89	0.806
I3L7V5	Transcription termination factor 2 OS=Sus scrofa OX=9823 GN=TTF2	0.661	Down	0.0114792	TTF2	124.46	2.5744	0.9	1	1	1	0.786	0.827	1.008	1.179	1.405	1.384
I3L8M9	Ubiquitin specific peptidase 25 OS=Sus scrofa OX=9823 GN=USP25	1.224	Up	0.035196	USP25	122.07	12.844	3.4	3	3	3	0.94	1.076	1.163	0.847	0.869	0.882
I3L8T3	tRNA (guanine(37)-N1)-methyltransferase OS=Sus scrofa OX=9823 GN=TRMT5	1.998	Up	4.27e-05	TRMT5	57.071	26.202	17.4	9	12	9	1.18	1.17	1.239	0.584	0.637	0.575
I3L8U6	Tudor domain containing 6 OS=Sus scrofa OX=9823 GN=TDRD6	0.79	Down	0.00129602	TDRD6	237.03	84.338	12.9	25	30	25	0.899	0.941	0.935	1.115	1.216	1.181
I3L908	WD repeat and HMG-box DNA binding protein 1 OS=Sus scrofa OX=9823 GN=WDHD1	1.322	Up	0.037002	WDHD1	117.21	23.403	8	8	10	8	0.869	1.141	1.104	0.802	0.752	0.802
I3L9C3	"SEC24 homolog D, COPII coat complex component OS=Sus scrofa OX=9823 GN=SEC24D"	0.76	Down	0.034976	SEC24D	86.985	2.4576	2.1	2	2	2	0.937	0.825	0.985	1.209	1.188	1.219
I3L9H8	Staufen double-stranded RNA binding protein 1 OS=Sus scrofa OX=9823 GN=STAU1	0.658	Down	0.0116992	STAU1	55.085	188.14	43.3	19	25	19	0.976	0.859	0.845	1.37	1.361	1.343
I3LAA0	Retinoic acid receptor responder 1 OS=Sus scrofa OX=9823 GN=RARRES1	0.598	Down	0.036697	RARRES1	32.871	14.205	13.1	3	3	3	0.898	0.676	0.589	0.952	1.303	1.362
I3LAI8	ZW10 interacting kinetochore protein OS=Sus scrofa OX=9823 GN=ZWINT	1.917	Up	0.049124	ZWINT	33.245	17.861	9.9	2	2	2	1.141	1.271	1.611	0.709	0.44	0.95
I3LAJ6	RAS like proto-oncogene A OS=Sus scrofa OX=9823 GN=RALA	1.293	Up	0.0009217	RALA	23.521	38.441	31.1	7	14	6	1.051	1.117	1.034	0.832	0.846	0.798
I3LBG5	Regulator of MON1-CCZ1 OS=Sus scrofa OX=9823 GN=RMC1	1.339	Up	0.010199	RMC1	67.34	29.563	15.7	8	13	8	0.984	1.157	1.14	0.767	0.871	0.813
I3LBZ0	Extended synaptotagmin 3 OS=Sus scrofa OX=9823 GN=ESYT3	0.567	Down	0.049204	ESYT3	99.526	3.3857	1.8	2	3	2	1.213	0.609	0.684	1.342	1.612	1.468
I3LCH3	RNA polymerase II subunit C OS=Sus scrofa OX=9823 GN=POLR2C	2.109	Up	0.048022	POLR2C	31.402	9.8867	13.1	3	4	3	1.229	0.836	1.619	0.396	0.712	0.639
I3LCW0	Nucleoporin NUP53 OS=Sus scrofa OX=9823 GN=NUP35	3.673	Up	2.35e-05	NUP35	35.049	6.9526	10.1	3	4	3	1.231	1.351	1.337	0.328	0.392	0.347
I3LCZ0	Uncharacterized protein OS=Sus scrofa OX=9823 GN=LOC106504145	1.636	Up	0.00048122	LOC106504145	52.239	9.7499	9.6	5	6	5	1.268	1.118	1.23	0.773	0.701	0.736
I3LD12	RBR-type E3 ubiquitin transferase OS=Sus scrofa OX=9823 GN=ARIH1	1.267	Up	0.019343	ARIH1	64.105	42.542	17.3	9	9	9	0.932	1.13	1.102	0.84	0.844	0.814
I3LD81	Cell division cycle 7 OS=Sus scrofa OX=9823 GN=CDC7	1.954	Up	0.0029611	CDC7	61.478	26.339	5	2	2	2	1.11	1.182	1.255	0.492	0.669	0.654
I3LDA5	EH domain containing 4 OS=Sus scrofa OX=9823 GN=EHD4	0.81	Down	0.0078971	EHD4	61.199	33.511	15.2	7	7	6	1.001	0.886	0.892	1.168	1.106	1.156
I3LDH3	Poly [ADP-ribose] polymerase OS=Sus scrofa OX=9823 GN=PARP1	1.261	Up	0.003163	PARP1	111.52	53.679	12.3	11	14	11	1.076	1.068	1.032	0.87	0.866	0.783
I3LDW0	Centrosomal protein 170 OS=Sus scrofa OX=9823 GN=CEP170	1.294	Up	0.0169782	CEP170	151.61	14.749	5.6	6	6	6	1.281	1.055	1.12	0.881	0.941	0.849
I3LET5	Lysine demethylase 3A OS=Sus scrofa OX=9823 GN=KDM3A	2.159	Up	0.0033568	KDM3A	147.32	5.1165	2.1	3	3	3	1.107	1.009	1.446	0.499	0.607	0.544
I3LFU3	Ring finger protein 213 OS=Sus scrofa OX=9823 GN=RNF213	0.614	Down	0.00041558	RNF213	233.61	1.5365	0.4	1	1	1	0.846	0.756	0.755	1.339	1.232	1.265
I3LFV7	Synaptotagmin 5 OS=Sus scrofa OX=9823 GN=SYT5	0.798	Down	0.034903	SYT5	43.091	18.004	21.8	7	7	5	0.895	0.801	1.006	1.096	1.089	1.2
I3LFX1	"ArfGAP with RhoGAP domain, ankyrin repeat and PH domain 1 OS=Sus scrofa OX=9823 GN=ARAP1"	0.379	Down	0.0002829	ARAP1	156.59	1.7989	0.9	1	1	1	0.648	0.614	0.788	1.713	1.787	1.906
I3LG66	Uncharacterized protein OS=Sus scrofa OX=9823	0.663	Down	0.00164129	---	65.607	1.4576	1.2	1	1	1	0.981	0.864	0.823	1.324	1.384	1.316
I3LGC2	Ribosome binding protein 1 OS=Sus scrofa OX=9823 GN=RRBP1	0.586	Down	1.97e-06	RRBP1	160.75	257.09	48.2	67	87	67	0.831	0.804	0.814	1.425	1.387	1.369
I3LH38	Bystin OS=Sus scrofa OX=9823 GN=BYSL	5.129	Up	0.0105027	BYSL	49.3	2.2765	2.1	1	2	1	1.018	1.189	1.265	0.414	0.146	0.117
I3LH66	"ArfGAP with SH3 domain, ankyrin repeat and PH domain 1 OS=Sus scrofa OX=9823 GN=ASAP1"	1.36	Up	0.046941	ASAP1	116.7	6.7633	21	20	35	1	1.026	0.93	1.313	0.778	0.79	0.835
I3LH91	"Palladin, cytoskeletal associated protein OS=Sus scrofa OX=9823 GN=PALLD"	0.824	Down	0.0180388	PALLD	138.29	28.057	6.2	8	12	8	0.928	1.013	0.855	1.103	1.153	1.138
I3LHT9	Syntaxin-12 OS=Sus scrofa OX=9823 GN=STX12	1.218	Up	0.00171924	STX12	31.416	165.27	29.7	7	17	7	1.025	1.101	1.035	0.847	0.86	0.888
I3LII4	Serine/threonine-protein kinase PLK OS=Sus scrofa OX=9823 GN=PLK1	1.251	Up	0.0040206	PLK1	68.053	15.527	13.7	7	9	7	1.025	1.028	1.111	0.82	0.82	0.889
I3LIL0	Nucleoporin like 2 OS=Sus scrofa OX=9823 GN=NUPL2	3.395	Up	0.00101772	NUPL2	44.477	13.884	10.8	4	4	4	1.58	1.103	1.252	0.399	0.441	0.319
I3LJ42	Guanine nucleotide-binding protein subunit gamma OS=Sus scrofa OX=9823 GN=GNG2	1.343	Up	0.036382	GNG2	7.8501	5.1464	22.5	1	2	1	0.941	1.141	1.231	0.905	0.789	0.773
I3LJ77	Downstream neighbor of SON OS=Sus scrofa OX=9823 GN=DONSON	5.361	Up	0.00035569	DONSON	62.387	16.252	10.7	5	5	5	1.91	1.241	1.406	0.326	0.267	0.257
I3LJB6	SAC1 like phosphatidylinositide phosphatase OS=Sus scrofa OX=9823 GN=SACM1L	1.274	Up	0.04402	SACM1L	67.13	28.397	12.6	7	11	7	1.256	1.015	1.012	0.793	0.876	0.908
I3LJE1	Uncharacterized protein OS=Sus scrofa OX=9823 GN=SHCBP1	1.451	Up	0.00023605	SHCBP1	80.475	15.212	12.1	9	9	9	1.049	1.127	1.127	0.737	0.783	0.756
I3LJR4	DNA-directed RNA polymerase subunit OS=Sus scrofa OX=9823 GN=POLR2A	1.415	Up	0.0042352	POLR2A	215.86	15.992	3.8	8	9	8	1.093	1.168	1.09	0.789	0.791	0.788
I3LJR5	Zinc finger CCHC domain-containing protein 8 OS=Sus scrofa OX=9823 GN=ZCCHC8	1.812	Up	0.0046837	ZCCHC8	78.197	4.453	2.3	2	2	2	1.026	1.341	1.19	0.747	0.62	0.596
I3LJW2	Fibrinogen gamma chain precursor OS=Sus scrofa OX=9823 GN=FGG	1.253	Up	0.00061742	FGG	49.618	83.852	21	9	10	9	0.794	0.744	0.796	0.627	0.613	0.622
I3LKF2	Uncharacterized protein OS=Sus scrofa OX=9823 GN=TRIOBP	0.74	Down	0.030339	TRIOBP	69.963	21.096	8.1	5	5	5	1.05	0.795	0.966	1.219	1.377	1.202
I3LKM6	Tudor domain containing 1 OS=Sus scrofa OX=9823 GN=TDRD1	0.657	Down	9.53e-05	TDRD1	129.85	91.296	12.9	13	16	13	0.847	0.79	0.802	1.199	1.257	1.257
I3LKM7	Ral GTPase-activating protein subunit alpha-1 OS=Sus scrofa OX=9823 GN=RALGAPA1	0.372	Down	0.00048059	RALGAPA1	192.87	7.3151	2.6	5	6	4	0.536	0.614	0.72	1.648	1.568	1.817
I3LKT8	Histone-binding protein RBBP4 OS=Sus scrofa OX=9823 GN=RBBP4	1.425	Up	0.0023606	RBBP4	47.655	46.822	24.5	10	20	3	1.24	1.091	1.125	0.816	0.758	0.852
I3LLM3	Phospholipase A2 OS=Sus scrofa OX=9823 GN=PLA2G4A	1.612	Up	0.00041713	PLA2G4A	85.375	120.26	19.4	13	23	13	1.237	1.133	1.135	0.732	0.68	0.762
I3LM23	Cbl proto-oncogene like 1 OS=Sus scrofa OX=9823 GN=CBLL1	1.412	Up	0.00064243	CBLL1	48.955	15.851	13.2	5	6	4	1.171	1.046	1.096	0.781	0.802	0.764
I3LM93	Transportin 1 OS=Sus scrofa OX=9823 GN=TNPO1	1.316	Up	0.0118553	TNPO1	101.32	95.151	11.9	10	16	8	0.954	1.085	1.163	0.788	0.8	0.846
I3LM99	Grancalcin OS=Sus scrofa OX=9823 GN=GCA	1.69	Up	0.00047549	GCA	33.425	26.021	16.2	5	8	5	1.262	1.173	1.137	0.682	0.761	0.671
I3LMA9	Syntaxin binding protein 5 like OS=Sus scrofa OX=9823 GN=STXBP5L	1.93	Up	3.54e-05	STXBP5L	50.66	87.684	20	8	10	8	1.137	1.157	1.112	0.592	0.616	0.557
I3LMB0	Caprin family member 2 OS=Sus scrofa OX=9823 GN=CAPRIN2	0.508	Down	0.000137217	CAPRIN2	113.04	144.42	24.9	23	44	23	0.798	0.76	0.698	1.478	1.549	1.415
I3LMG8	SAGA complex associated factor 29 OS=Sus scrofa OX=9823 GN=SGF29	1.598	Up	0.022299	SGF29	33.254	9.9718	6.1	2	2	2	1.496	1.026	1.044	0.729	0.78	0.722
I3LML4	Tubulin alpha chain OS=Sus scrofa OX=9823 GN=TUBAL3	1.765	Up	0.00043563	TUBAL3	49.327	12.911	7.4	3	4	3	1.049	1.124	1.034	0.551	0.627	0.639
I3LMR5	Gametocyte specific factor 1 OS=Sus scrofa OX=9823 GN=GTSF1	0.574	Down	1.68e-05	GTSF1	19.117	7.7681	16.8	3	4	3	0.766	0.786	0.785	1.304	1.381	1.387
I3LN54	ADP-ribosylation factor-like protein 6-interacting protein 1 OS=Sus scrofa OX=9823 GN=ARL6IP1	1.262	Up	0.0158237	ARL6IP1	23.446	4.191	8.9	2	2	2	1.163	0.979	1.062	0.852	0.802	0.885
I3LN62	Vesicle-associated membrane protein 7 OS=Sus scrofa OX=9823 GN=VAMP7	1.223	Up	0.036918	VAMP7	24.935	70.081	28.6	7	10	7	0.916	1.086	1.113	0.882	0.837	0.828
I3LND7	Cell division cycle protein 123 homolog OS=Sus scrofa OX=9823 GN=CDC123	3.191	Up	0.00100206	CDC123	35.518	9.2155	16.4	5	5	5	1.112	1.198	1.261	0.414	0.282	0.423
I3LNV7	Meiosis regulator and mRNA stability factor 1 OS=Sus scrofa OX=9823 GN=MARF1	0.719	Down	0.0156166	MARF1	188.32	14.304	1.5	2	2	2	1.005	0.915	0.789	1.264	1.346	1.16
I3LP40	Tudor and KH domain-containing protein OS=Sus scrofa OX=9823 GN=TDRKH	0.797	Down	0.0047555	TDRKH	61.529	145.89	20.1	9	18	9	0.943	0.988	0.885	1.234	1.164	1.137
I3LPI5	Peroxisomal biogenesis factor 1 OS=Sus scrofa OX=9823 GN=PEX1	0.801	Down	0.030339	PEX1	146.17	40.491	11.2	14	16	14	1.025	0.932	0.857	1.098	1.271	1.143
I3LPL7	Golgi glycoprotein 1 OS=Sus scrofa OX=9823 GN=GLG1	0.769	Down	0.0059758	GLG1	132.65	33.348	8.2	9	9	9	0.981	0.847	0.961	1.246	1.167	1.216
I3LPU8	Uncharacterized protein OS=Sus scrofa OX=9823 GN=HNRNPL	0.679	Down	0.030436	HNRNPL	29.28	8.5838	11.9	3	5	3	0.863	0.844	0.708	0.976	1.362	1.219
I3LPX9	Structural maintenance of chromosomes flexible hinge domain containing 1 OS=Sus scrofa OX=9823 GN=SMCHD1	1.568	Up	0.00082383	SMCHD1	209.56	11.09	2.6	4	5	4	1.175	1.134	1.268	0.729	0.734	0.818
I3LQ25	Solute carrier family 16 member 3 OS=Sus scrofa OX=9823 GN=SLC16A3	0.377	Down	0.0034984	SLC16A3	48.799	8.8057	4.4	2	2	2	0.575	0.697	0.603	1.668	1.647	1.654
I3LR07	Family with sequence similarity 91 member A1 OS=Sus scrofa OX=9823 GN=FAM91A1	0.719	Down	0.00116177	FAM91A1	93.939	3.0046	3.3	3	3	3	0.882	0.856	0.786	1.212	1.17	1.13
I3LRD3	Centromere protein E OS=Sus scrofa OX=9823 GN=CENPE	1.715	Up	0.00027958	CENPE	313.39	25.579	4.9	14	15	14	1.027	1.067	1.133	0.669	0.619	0.594
I3LRD5	Eukaryotic translation initiation factor 4H isoform 1 OS=Sus scrofa OX=9823 GN=EIF4H	1.36	Up	0.00178104	EIF4H	27.337	51.745	29.4	7	9	7	1.196	1.083	1.07	0.822	0.851	0.789
I3LRF1	Uncharacterized protein OS=Sus scrofa OX=9823 GN=BUB1	1.349	Up	0.0060805	BUB1	122.24	1.7773	1.5	2	2	2	1.244	1.154	1.032	0.832	0.841	0.87
I3LRU1	Rhophilin Rho GTPase binding protein 2 OS=Sus scrofa OX=9823 GN=RHPN2	1.869	Up	5.82e-05	RHPN2	59.78	4.4871	4.3	2	3	2	1.321	1.262	1.243	0.722	0.671	0.654
I3LRU8	DEAH-box helicase 36 OS=Sus scrofa OX=9823 GN=DHX36	0.8	Down	0.00157531	DHX36	105.85	43.382	10.9	10	11	10	0.967	0.902	0.93	1.13	1.154	1.213
I3LS12	Sorting nexin 2 OS=Sus scrofa OX=9823 GN=SNX2	1.234	Up	0.039742	SNX2	55.714	85.746	20.5	10	13	9	1.255	1.05	1.01	0.922	0.884	0.881
I3LS23	Protein BANP OS=Sus scrofa OX=9823 GN=BANP	1.51	Up	0.033462	BANP	54.602	13.177	11.4	5	5	5	0.899	1.249	1.086	0.681	0.837	0.624
I3LS70	Importin subunit alpha OS=Sus scrofa OX=9823 GN=KPNA2	1.554	Up	0.00032046	KPNA2	57.975	216.66	14.6	6	8	6	1.039	1.103	1.169	0.709	0.69	0.732
I3LSA2	Glutaminase 2 OS=Sus scrofa OX=9823 GN=GLS2	1.331	Up	0.00145816	GLS2	64.034	91.685	15.5	8	11	8	1.194	1.104	1.098	0.81	0.878	0.864
I3LSP4	Uncharacterized protein OS=Sus scrofa OX=9823 GN=GOLGA2	0.771	Down	0.0004986	GOLGA2	112.92	45.247	14.6	14	16	14	0.927	0.922	0.98	1.208	1.199	1.262
I3LSZ1	SUMO-conjugating enzyme UBC9 OS=Sus scrofa OX=9823 GN=UBE2I	1.25	Up	0.00092066	UBE2I	18.007	14.882	31.6	5	10	5	1.045	1.095	1.098	0.897	0.841	0.852
I3LT03	Origin recognition complex subunit 1 OS=Sus scrofa OX=9823 GN=ORC1	1.323	Up	0.025977	ORC1	97.794	7.6332	4.1	3	3	3	1.2	1.041	1.307	0.862	0.844	0.976
I3LTB8	Complement C3 OS=Sus scrofa OX=9823 GN=C3	0.559	Down	4e-05	C3	185.27	301.69	19	34	43	30	0.626	0.671	0.689	1.2	1.167	1.184
I3LTY7	Engulfment and cell motility 2 OS=Sus scrofa OX=9823 GN=ELMO2	0.827	Down	0.0179409	ELMO2	70.262	9.7603	7.4	4	6	4	0.947	0.832	0.954	1.118	1.055	1.13
I3LU53	Sin3A associated protein 30 OS=Sus scrofa OX=9823 GN=SAP30	2.956	Up	0.00054138	SAP30	23.373	6.7599	13.6	3	5	3	1.387	1.163	1.373	0.515	0.375	0.437
I3LUI5	Family with sequence similarity 151 member B OS=Sus scrofa OX=9823 GN=FAM151B	1.375	Up	0.00086321	FAM151B	31.483	26.967	25.4	6	12	6	1.183	1.094	1.062	0.827	0.815	0.786
I3LUM8	Uncharacterized protein OS=Sus scrofa OX=9823 GN=FARSB	0.737	Down	0.00053777	FARSB	66.321	136.62	28.9	16	29	16	0.849	0.855	0.896	1.122	1.183	1.222
I3LUM9	Eukaryotic translation initiation factor 2 subunit 3 OS=Sus scrofa OX=9823 GN=EIF2S3	0.808	Down	0.0056215	EIF2S3	51.065	56.901	27.5	11	14	11	0.908	0.902	0.937	1.185	1.051	1.163
I3LUP6	Nucleophosmin 1 OS=Sus scrofa OX=9823 GN=NPM1	1.559	Up	0.0106004	NPM1	32.603	14.148	23.5	8	16	8	0.996	1.165	1.062	0.695	0.691	0.681
I3LUR1	Uncharacterized protein OS=Sus scrofa OX=9823 GN=HNRNPUL2	0.708	Down	0.023059	HNRNPUL2	82.763	12.288	7.3	5	5	5	0.747	0.872	0.982	1.325	1.096	1.252
I3LUX4	Palmitoyltransferase OS=Sus scrofa OX=9823 GN=ZDHHC13	1.288	Up	0.0170833	ZDHHC13	71.308	25.604	9.5	5	6	5	1.293	1.057	1.203	0.935	0.947	0.876
K7GM30	Fragile X mental retardation 1 OS=Sus scrofa OX=9823 GN=FMR1	0.515	Down	0.0025598	FMR1	59.152	153.96	27.7	13	21	1	0.691	0.901	0.666	1.553	1.434	1.401
K7GM40	Apolipoprotein A-I OS=Sus scrofa OX=9823 GN=APOA1	1.678	Up	0.00166132	APOA1	30.33	61.496	43.4	11	13	8	1.13	1.023	0.926	0.625	0.642	0.568
K7GMV4	Neural cell adhesion molecule 1 OS=Sus scrofa OX=9823 GN=NCAM1	0.721	Down	0.0052846	NCAM1	97.221	13.607	6.2	5	7	5	0.835	0.92	0.996	1.276	1.338	1.202
K7GPD4	Integrin subunit beta 4 OS=Sus scrofa OX=9823 GN=ITGB4	0.784	Down	0.00176393	ITGB4	167.7	34.989	9.6	13	14	13	0.9	0.874	0.948	1.139	1.123	1.209
K7GPM9	Tyrosine-protein kinase OS=Sus scrofa OX=9823 GN=FYN	2.068	Up	0.0021825	FYN	54.44	19.732	8.3	4	4	1	1.016	1.188	1.224	0.562	0.467	0.629
K7GR87	"ALG13, UDP-N-acetylglucosaminyltransferase subunit OS=Sus scrofa OX=9823 GN=ALG13"	0.521	Down	0.000136618	ALG13	102.99	7.3597	4.7	4	4	4	0.815	0.799	0.786	1.666	1.498	1.439
K7GSA5	Arginase OS=Sus scrofa OX=9823 GN=ARG2	0.673	Down	0.00053517	ARG2	35.668	23.248	11.1	3	4	3	0.792	0.882	0.888	1.259	1.248	1.301
K7GSC4	Hyaluronan mediated motility receptor OS=Sus scrofa OX=9823 GN=HMMR	2.465	Up	1.57e-05	HMMR	82.359	103.63	27.8	18	22	18	1.265	1.144	1.207	0.473	0.495	0.499
K7GSD6	Gem-associated protein 8 OS=Sus scrofa OX=9823 GN=GEMIN8	1.463	Up	0.0025988	GEMIN8	23.859	6.6542	19.1	4	4	4	1.185	0.997	1.084	0.774	0.707	0.752
K7GSK1	NAD(P)(+)--arginine ADP-ribosyltransferase OS=Sus scrofa OX=9823 GN=ART3	1.543	Up	0.0027354	ART3	41.505	2.4524	2.7	1	1	1	1.308	1.158	1.118	0.843	0.724	0.755
K9J4R8	Protein S100-A13 OS=Sus scrofa OX=9823 GN=S100A13	0.235	Down	0.035358	S100A13	11.213	8.5161	31.6	3	3	3	0.763	0.28	0.384	2.046	2.093	1.927
M3TYR7	Nicotinate phosphoribosyltransferase domain containing 1 OS=Sus scrofa OX=9823 GN=NAPRT1	1.235	Up	0.025941	NAPRT1	57.877	32.546	14.5	6	6	6	1.135	0.999	1.196	0.948	0.887	0.861
M3UZA2	Kelch like family member 11 OS=Sus scrofa OX=9823 GN=KLHL11	0.63	Down	0.0109792	KLHL11	80.119	5.1185	4.8	4	5	4	0.984	0.767	0.762	1.482	1.3	1.204
M3V815	Heterogeneous nuclear ribonucleoprotein R tv2 OS=Sus scrofa OX=9823 GN=HNRNPR	1.38	Up	0.026676	HNRNPR	70.929	2.5035	12.3	8	11	2	0.977	1.099	1.274	0.837	0.727	0.863
O62680	CD59 glycoprotein OS=Sus scrofa OX=9823 GN=CD59	0.777	Down	0.049099	CD59	13.79	8.6928	14.6	2	2	2	0.981	0.874	0.784	1.228	1.171	0.997
O77591	Inositol monophosphatase 1 OS=Sus scrofa OX=9823 GN=IMPA1	1.273	Up	0.0112994	IMPA1	30.132	86.826	24.5	7	9	7	1.197	1.06	1.049	0.925	0.833	0.84
P00503	"Aspartate aminotransferase, cytoplasmic OS=Sus scrofa OX=9823 GN=GOT1"	1.209	Up	0.0084842	GOT1	46.474	171.38	20.6	7	10	7	1.153	1.069	1.08	0.905	0.963	0.864
P02543	Vimentin OS=Sus scrofa OX=9823 GN=VIM	0.678	Down	5.56e-07	VIM	53.667	143.39	48.1	24	47	21	0.899	0.922	0.903	1.337	1.336	1.345
P03970	Inhibin beta A chain OS=Sus scrofa OX=9823 GN=INHBA	1.429	Up	0.0111758	INHBA	47.476	1.7334	1.9	1	1	1	0.999	1.162	1.239	0.87	0.761	0.748
P05024	Sodium/potassium-transporting ATPase subunit alpha-1 OS=Sus scrofa OX=9823 GN=ATP1A1	0.812	Down	0.0031356	ATP1A1	112.68	214.31	21.2	20	31	20	0.986	0.904	0.907	1.184	1.121	1.138
P11493	Serine/threonine-protein phosphatase 2A catalytic subunit beta isoform (Fragment) OS=Sus scrofa OX=9823 GN=PPP2CB	1.294	Up	0.0134983	PPP2CB	33.61	74.468	36.5	8	24	1	1.203	1.014	1.032	0.794	0.846	0.87
P12682	High mobility group protein B1 OS=Sus scrofa OX=9823 GN=HMGB1	1.344	Up	0.00034442	HMGB1	24.917	12.495	18.6	4	5	4	1.088	1.075	1.091	0.847	0.798	0.776
P17741	High mobility group protein B2 OS=Sus scrofa OX=9823 GN=HMGB2	1.313	Up	0.0065814	HMGB2	24.133	10.235	15.2	3	3	3	0.982	0.994	1.064	0.747	0.725	0.844
P19620	Annexin A2 OS=Sus scrofa OX=9823 GN=ANXA2	0.317	Down	3.6e-05	ANXA2	38.422	126.07	41.6	14	25	14	0.577	0.586	0.526	1.722	1.93	1.671
P24540	Acylphosphatase-1 OS=Sus scrofa OX=9823 GN=ACYP1	0.832	Down	0.0089426	ACYP1	11.427	12.91	33.7	5	15	5	0.95	0.934	0.86	1.141	1.105	1.052
P27917	Apolipoprotein C-III OS=Sus scrofa OX=9823 GN=APOC3	1.822	Up	0.0033358	APOC3	10.704	7.8741	38.5	3	4	3	1.091	1.308	1.197	0.636	0.761	0.577
P50118	Proto-oncogene serine/threonine-protein kinase mos OS=Sus scrofa OX=9823 GN=MOS	2.698	Up	8.2e-05	MOS	37.94	1.4583	2.6	1	1	1	1.436	1.238	1.394	0.508	0.465	0.535
P50828	Hemopexin OS=Sus scrofa OX=9823 GN=HPX	1.395	Up	0.002981	HPX	51.305	47.361	17.2	7	7	7	0.74	0.869	0.822	0.575	0.564	0.604
P54613	Serine/threonine-protein phosphatase 2A 65 kDa regulatory subunit A beta isoform (Fragment) OS=Sus scrofa OX=9823 GN=PPP2R1B	1.24	Up	0.00129709	PPP2R1B	66.213	18.77	13.6	8	9	6	1.072	1.054	1.102	0.896	0.879	0.829
P61958	Small ubiquitin-related modifier 2 OS=Sus scrofa OX=9823 GN=SUMO2	1.906	Up	0.00031533	SUMO2	10.871	19.176	23.2	2	5	2	1.118	1.213	1.145	0.581	0.67	0.573
P63053	Ubiquitin-60S ribosomal protein L40 OS=Sus scrofa OX=9823 GN=UBA52	0.72	Down	0.038085	UBA52	14.728	28.044	32	6	88	2	0.795	0.99	0.832	1.217	1.215	1.203
P67937	Tropomyosin alpha-4 chain OS=Sus scrofa OX=9823 GN=TPM4	0.472	Down	5.72e-05	TPM4	28.521	67.532	38.7	12	9	6	0.722	0.811	0.798	1.601	1.626	1.71
Q06A94	Heterogeneous nuclear ribonucleoprotein A1 OS=Sus scrofa OX=9823 GN=HNRNPA1	1.302	Up	0.02304	HNRNPA1	34.196	38.686	27.8	7	12	7	1.006	1.113	0.922	0.819	0.813	0.704
Q06AA3	Regucalcin OS=Sus scrofa OX=9823 GN=RGN	0.265	Down	0.00029741	RGN	33.117	2.1573	3	1	1	1	0.422	0.616	0.484	2.01	1.895	1.841
Q06AT9	RNA-binding protein 4B OS=Sus scrofa OX=9823 GN=RBM4B	1.457	Up	0.00043945	RBM4B	40.053	17.467	18.7	7	8	7	1.1	1.125	1.115	0.805	0.773	0.715
Q06AU2	Ras-related protein Rap-2a OS=Sus scrofa OX=9823 GN=RAP2A	0.556	Down	0.031415	RAP2A	20.504	16.633	24.6	4	6	2	0.921	0.794	0.635	1.41	1.431	1.383
Q08094	Calponin-2 (Fragment) OS=Sus scrofa OX=9823 GN=CNN2	0.666	Down	0.00070254	CNN2	32.03	31.055	30.1	8	20	8	0.882	0.882	0.777	1.249	1.289	1.277
Q29205	60S ribosomal protein L11 OS=Sus scrofa OX=9823 GN=RPL11	0.351	Down	0.0085829	RPL11	20.212	9.1997	20.2	4	8	3	0.326	0.632	0.625	1.574	1.594	1.338
Q2F7Z4	Mediator of RNA polymerase II transcription subunit 7 OS=Sus scrofa OX=9823 GN=MED7	0.817	Down	0.00130222	MED7	27.165	2.6136	3.9	1	1	1	0.883	0.926	0.887	1.063	1.096	1.139
Q2XVP5	Microtubule-associated protein RP/EB family member 1 OS=Sus scrofa OX=9823 GN=MAPRE1	1.222	Up	0.040741	MAPRE1	29.977	207.51	37.7	9	13	7	0.941	1.161	1.018	0.832	0.828	0.894
Q4PLW0	Perilipin-2 OS=Sus scrofa OX=9823 GN=PLIN2	0.813	Down	0.045059	PLIN2	50.195	171.98	42.7	18	51	2	0.98	1.026	0.899	1.243	1.054	1.274
Q52NJ1	Ras-related protein Rab-11A OS=Sus scrofa OX=9823 GN=RAB11A	0.341	Down	0.0039768	RAB11A	24.393	10.183	49.5	9	17	1	0.418	0.658	0.763	1.692	1.936	1.764
Q56P20	ADP-ribosylation factor 4 OS=Sus scrofa OX=9823 GN=ARF4	1.232	Up	0.026805	ARF4	20.485	10.999	33.9	5	11	3	0.977	1.191	1.051	0.877	0.844	0.892
Q5S1U1	Heat shock protein beta-1 OS=Sus scrofa OX=9823 GN=HSPB1	0.778	Down	0.023097	HSPB1	22.941	100.94	55.1	9	17	9	1.004	0.877	0.939	1.204	1.208	1.214
Q6GUA6	Growth differentiation factor 9 OS=Sus scrofa OX=9823 GN=GDF9	0.762	Down	0.0029631	GDF9	50.595	263	32.7	15	38	15	0.934	0.84	0.819	1.12	1.118	1.163
Q6UGB2	Methylsterol monooxygenase 1 OS=Sus scrofa OX=9823 GN=MSMO1	1.754	Up	0.02012	MSMO1	35.101	20.575	8.9	2	3	2	1.551	1.282	1.011	0.739	0.827	0.626
Q71LE2	Histone H3.3 OS=Sus scrofa OX=9823 GN=H3F3A	2.32	Up	4.1e-05	H3F3A	15.328	4.68	11.8	2	4	1	1.122	1.19	1.135	0.531	0.463	0.492
Q75R37	Hyaluronan synthase 3 OS=Sus scrofa OX=9823 GN=shas3	2.897	Up	8.24e-05	shas3	63.11	4.654	4.5	3	3	3	1.227	1.409	1.373	0.422	0.46	0.502
Q767L0	ATP-binding cassette sub-family F member 1 OS=Sus scrofa OX=9823 GN=ABCF1	0.804	Down	2.24e-05	ABCF1	91.636	72.751	21.4	16	35	16	0.925	0.904	0.91	1.125	1.151	1.129
Q767L7	Tubulin beta chain OS=Sus scrofa OX=9823 GN=TUBB	0.803	Down	0.035837	TUBB	49.67	32.183	34.5	13	73	2	0.927	0.943	0.899	1.169	1.27	1.008
Q864B5	DnaJ homolog subfamily A member 4 OS=Sus scrofa OX=9823 GN=DNAJA4	0.792	Down	0.039922	DNAJA4	44.838	11.351	11.8	4	5	4	0.898	0.997	0.815	1.261	1.069	1.092
Q8SPS7	Haptoglobin OS=Sus scrofa OX=9823 GN=HP	1.504	Up	0.0106174	HP	38.481	21.094	18.7	6	13	6	0.86	0.76	0.776	0.502	0.471	0.62
Q95JH1	Integrin beta OS=Sus scrofa OX=9823 GN=CD61	0.617	Down	0.04306	CD61	86.365	33.211	7.9	5	5	5	1.106	0.618	0.75	1.265	1.426	1.316
Q9GK37	Corticosteroid-binding globulin OS=Sus scrofa OX=9823 GN=Serpina6	1.343	Up	0.037075	Serpina6	45.188	4.9104	4.9	2	3	2	1.323	1.054	1.349	0.972	0.831	0.971
Q9GLP0	Integrin beta-1 OS=Sus scrofa OX=9823 GN=ITGB1	0.655	Down	0.00113945	ITGB1	88.265	52.405	14.5	10	16	10	0.734	0.836	0.835	1.288	1.177	1.205
Q9TUQ3	Complement component C7 OS=Sus scrofa OX=9823 GN=C7	1.407	Up	0.00129782	C7	93.061	34.541	14.2	12	16	12	0.556	0.566	0.593	0.377	0.428	0.414
